# Supplementary material for: Cell nucleus localization and high anticancer activity of quinoline–benzopyran rhodium(iii) metal complexes as therapeutic and fluorescence imaging agents
Source: Royal Society of Chemistry journal article supplement (doi:10.1039/d2dt01929a), 2022-01-01
Supplement: d2dt01929a1.pdf [file d2dt01929a1.pdf]

## Electronic Supporting Information Materials

### Cell nucleus localization and high anticancer activity of quinoline-benzopyran rhodium(III) metal complexes as therapeutic and fluorescence imaging agents

Zhen-Feng Wang <sup>a,b</sup>, Xiao-Ling Nai <sup>c</sup>, Yue Xu <sup>c</sup>, Feng-Hua Pan <sup>c</sup>, Fu-Shun Tang <sup>a,\*</sup>

Qi-Pin Qin <sup>c</sup>, Lin Yang <sup>c</sup>, Shu-Hua Zhang <sup>a,b,\*</sup>

**Table S1.** Crystal data and structure refinement details for **RhN1**.

|                                                              |                                                                                   |
|--------------------------------------------------------------|-----------------------------------------------------------------------------------|
| Empirical formula                                            | C <sub>16</sub> H <sub>15</sub> Cl <sub>4</sub> N <sub>2</sub> O <sub>2</sub> RhS |
| Formula weight                                               | 544.07                                                                            |
| Crystal system                                               | triclinic                                                                         |
| Space group                                                  | <i>P</i> -1                                                                       |
| <i>a</i> /Å                                                  | 8.066(1)                                                                          |
| <i>b</i> /Å                                                  | 8.563(1)                                                                          |
| <i>c</i> /Å                                                  | 14.400(1)                                                                         |
| <i>α</i> /°                                                  | 78.253(3)                                                                         |
| <i>β</i> /°                                                  | 84.796(3)                                                                         |
| <i>γ</i> /°                                                  | 86.950(3)                                                                         |
| <i>V</i> /Å <sup>3</sup>                                     | 969.08(14)                                                                        |
| <i>Z</i>                                                     | 2                                                                                 |
| <i>D<sub>c</sub></i> (g cm <sup>-3</sup> )                   | 1.865                                                                             |
| <i>μ</i> /mm <sup>-1</sup>                                   | 1.554                                                                             |
| <i>F</i> (000)                                               | 540                                                                               |
| Crystal size/mm <sup>3</sup>                                 | 0.37 × 0.28 × 0.14                                                                |
| Radiation                                                    | MoK $\alpha$ ( $\lambda$ = 0.71073 Å)                                             |
| 2 $\theta$ range for data collection/°                       | 6.048 to 55.194                                                                   |
| Index ranges                                                 | -10 ≤ <i>h</i> ≤ 10, -11 ≤ <i>k</i> ≤ 11, -18 ≤ <i>l</i> ≤ 18                     |
| Reflections collected                                        | 20866                                                                             |
| Independent reflections                                      | 4486 [ <i>R</i> <sub>int</sub> = 0.0484, <i>R</i> <sub>sigma</sub> = 0.0506]      |
| Data/restraints/parameters                                   | 4486/0/240                                                                        |
| Goodness-of-fit on <i>F</i> <sup>2</sup>                     | 1.070                                                                             |
| Final <i>R</i> indexes [ <i>I</i> ≥ 2 $\sigma$ ( <i>I</i> )] | <i>R</i> <sub>1</sub> = 0.0349, <i>wR</i> <sub>2</sub> = 0.0752                   |
| Final <i>R</i> indexes [all data]                            | <i>R</i> <sub>1</sub> = 0.0625, <i>wR</i> <sub>2</sub> = 0.0821                   |
| Largest diff. peak/hole / e Å <sup>-3</sup>                  | 0.453/-0.612                                                                      |

$${}^a R_1 = \Sigma ||F_o| - |F_c||/\Sigma|F_o|; {}^b wR_2 = [\Sigma w(F_o^2 - F_c^2)^2/\Sigma w(F_o^2)^2]^{1/2}.$$

**Table S2.** Selected bond lengths (Å) for **RhN1**.

| Atom | Atom | Length/Å  | Atom | Atom | Length/Å |
|------|------|-----------|------|------|----------|
| Rh1  | S1   | 2.2655(8) | C3   | C4   | 1.376(5) |
| Rh1  | N1   | 2.077(2)  | C3   | C2   | 1.364(5) |
| Rh1  | N2   | 2.019(3)  | C5   | C6   | 1.485(4) |
| Rh1  | Cl2  | 2.3462(9) | C5   | C4   | 1.392(4) |
| Rh1  | Cl3  | 2.3346(9) | C6   | C7   | 1.458(4) |
| Rh1  | Cl1  | 2.3342(9) | C6   | C8   | 1.347(4) |
| S1   | O2   | 1.469(2)  | C1   | C2   | 1.369(4) |
| S1   | C15  | 1.775(3)  | C10  | C9   | 1.377(4) |
| S1   | C16  | 1.767(3)  | C10  | C11  | 1.381(5) |
| Cl4  | C13  | 1.731(4)  | C8   | C9   | 1.432(4) |
| N1   | C5   | 1.357(4)  | C9   | C14  | 1.394(5) |
| N1   | C1   | 1.337(4)  | C12  | C13  | 1.382(5) |
| N2   | C7   | 1.265(4)  | C12  | C11  | 1.379(5) |
| O1   | C7   | 1.349(4)  | C14  | C13  | 1.375(5) |
| O1   | C10  | 1.380(4)  |      |      |          |

**Table S3.** Selected bond angles (°) for **RhN1**.

| Atom | Atom | Atom | Angle/°   | Atom | Atom | Atom | Angle/°  |
|------|------|------|-----------|------|------|------|----------|
| S1   | Rh1  | Cl2  | 92.75(3)  | C2   | C3   | C4   | 118.4(3) |
| S1   | Rh1  | Cl3  | 90.25(3)  | N1   | C5   | C6   | 121.5(3) |
| S1   | Rh1  | Cl1  | 88.09(3)  | N1   | C5   | C4   | 119.3(3) |
| N1   | Rh1  | S1   | 177.30(7) | C4   | C5   | C6   | 119.2(3) |
| N1   | Rh1  | Cl2  | 88.39(7)  | C7   | C6   | C5   | 122.3(3) |
| N1   | Rh1  | Cl3  | 88.55(7)  | C8   | C6   | C5   | 120.6(3) |
| N1   | Rh1  | Cl1  | 94.35(7)  | C8   | C6   | C7   | 117.1(3) |
| N2   | Rh1  | S1   | 89.39(8)  | N2   | C7   | O1   | 116.0(3) |
| N2   | Rh1  | N1   | 88.20(10) | N2   | C7   | C6   | 124.7(3) |
| N2   | Rh1  | Cl2  | 87.80(9)  | O1   | C7   | C6   | 119.3(3) |
| N2   | Rh1  | Cl3  | 90.70(9)  | C3   | C4   | C5   | 120.8(3) |
| N2   | Rh1  | Cl1  | 176.80(9) | N1   | C1   | C2   | 122.6(3) |
| Cl3  | Rh1  | Cl2  | 176.64(3) | O1   | C10  | C11  | 117.2(3) |
| Cl1  | Rh1  | Cl2  | 90.35(3)  | C9   | C10  | O1   | 120.1(3) |
| Cl1  | Rh1  | Cl3  | 91.28(4)  | C9   | C10  | C11  | 122.7(3) |

|     |    |     |            |     |     |     |          |
|-----|----|-----|------------|-----|-----|-----|----------|
| O2  | S1 | Rh1 | 112.82(10) | C6  | C8  | C9  | 122.5(3) |
| O2  | S1 | C15 | 108.02(16) | C3  | C2  | C1  | 119.5(3) |
| O2  | S1 | C16 | 109.35(16) | C10 | C9  | C8  | 118.0(3) |
| C15 | S1 | Rh1 | 113.11(13) | C10 | C9  | C14 | 118.7(3) |
| C16 | S1 | Rh1 | 112.25(13) | C14 | C9  | C8  | 123.3(3) |
| C16 | S1 | C15 | 100.54(18) | C11 | C12 | C13 | 120.1(3) |
| C5  | N1 | Rh1 | 123.1(2)   | C13 | C14 | C9  | 118.9(3) |
| C1  | N1 | Rh1 | 117.6(2)   | C12 | C13 | C14 | 119.5(3) |
| C1  | N1 | C5  | 119.3(3)   | C14 | C13 | C14 | 118.9(3) |
| C7  | N2 | Rh1 | 122.4(2)   | C14 | C13 | C12 | 121.6(3) |
| C7  | O1 | C10 | 121.5(2)   | C12 | C11 | C10 | 118.0(3) |

**Table S4.** Crystal data and structure refinement details for **RhN2**.

|                                                |                                                               |
|------------------------------------------------|---------------------------------------------------------------|
| Empirical formula                              | $C_{18}H_{17}BrCl_3N_2O_4Rh$                                  |
| Formula weight                                 | 614.50                                                        |
| Crystal system                                 | triclinic                                                     |
| Space group                                    | $P-1$                                                         |
| $a/\text{\AA}$                                 | 7.932(1)                                                      |
| $b/\text{\AA}$                                 | 10.497(1)                                                     |
| $c/\text{\AA}$                                 | 14.048(1)                                                     |
| $\alpha/^\circ$                                | 103.36(1)                                                     |
| $\beta/^\circ$                                 | 103.59(1)                                                     |
| $\gamma/^\circ$                                | 100.60(1)                                                     |
| $V/\text{\AA}^3$                               | 1070.6(2)                                                     |
| $Z$                                            | 2                                                             |
| $D_c(\text{g/cm}^3)$                           | 1.906                                                         |
| $\mu/\text{mm}^{-1}$                           | 3.066                                                         |
| $F(000)$                                       | 604                                                           |
| Crystal size/ $\text{mm}^3$                    | $0.22 \times 0.18 \times 0.15$                                |
| Radiation                                      | MoK $\alpha$ ( $\lambda = 0.71073 \text{ \AA}$ )              |
| $\theta$ range for data collection/ $^\circ$   | 3.266 to 25.10                                                |
| Index ranges                                   | $-9 \leq h \leq 9, -10 \leq k \leq 12, -16 \leq l \leq 16$    |
| Reflections collected                          | 6502                                                          |
| Independent reflections                        | 3810 [ $R_{\text{int}} = 0.0285, R_{\text{sigma}} = 0.0618$ ] |
| Data/restraints/parameters                     | 3810/14/263                                                   |
| Goodness-of-fit on $F^2$                       | 0.993                                                         |
| Final R indexes [ $I \geq 2\sigma(I)$ ]        | $R_1 = 0.0508, wR_2 = 0.0924$                                 |
| Final R indexes [all data]                     | $R_1 = 0.0750, wR_2 = 0.1054$                                 |
| Largest diff. peak/hole / $e \text{ \AA}^{-3}$ | 1.037/-0.700                                                  |

$${}^a R_1 = \Sigma ||F_o| - |F_c||/\Sigma|F_o|; {}^b wR_2 = [\Sigma w(F_o^2 - F_c^2)^2/\Sigma w(F_o^2)^2]^{1/2}.$$

**Table S5.** Selected bond lengths (Å) for **RhN2**.

| Atom | Atom | Length/Å  | Atom | Atom | Length/Å  |
|------|------|-----------|------|------|-----------|
| Rh1  | Cl1  | 2.334(2)  | C1   | C6   | 1.388(9)  |
| Rh1  | Cl2  | 2.299(2)  | C2   | C3   | 1.378(10) |
| Rh1  | Cl3  | 2.326(2)  | C3   | C4   | 1.389(11) |
| Rh1  | O1   | 2.195(4)  | C4   | C5   | 1.362(11) |
| Rh1  | N2   | 1.999(5)  | C5   | C6   | 1.399(10) |
| Rh1  | O4   | 2.055(5)  | C7   | C8   | 1.458(9)  |
| Br1  | C15  | 1.897(7)  | C8   | C9   | 1.470(9)  |
| O1   | C17  | 1.297(8)  | C8   | C10  | 1.365(8)  |
| O3   | C9   | 1.348(8)  | C10  | C11  | 1.415(9)  |
| O3   | C12  | 1.391(7)  | C11  | C12  | 1.386(9)  |
| N1   | C6   | 1.372(9)  | C11  | C16  | 1.408(9)  |
| N1   | C7   | 1.344(8)  | C12  | C13  | 1.362(10) |
| N2   | C1   | 1.410(8)  | C13  | C14  | 1.372(9)  |
| N2   | C7   | 1.336(8)  | C14  | C15  | 1.385(10) |
| O4   | C9   | 1.251(7)  | C15  | C16  | 1.363(10) |
| C1   | C2   | 1.391(10) | O2   | C18  | 1.249(8)  |

**Table S6.** Selected bond angles (°) for **RhN2**.

| Atom | Atom | Atom | Angle/°    | Atom | Atom | Atom | Angle/°  |
|------|------|------|------------|------|------|------|----------|
| Cl2  | Rh1  | Cl1  | 90.69(8)   | C5   | C4   | C3   | 121.4(8) |
| Cl2  | Rh1  | Cl3  | 91.46(8)   | C4   | C5   | C6   | 116.7(8) |
| Cl3  | Rh1  | Cl1  | 177.82(8)  | N1   | C6   | C1   | 106.6(6) |
| O1   | Rh1  | Cl1  | 90.43(12)  | N1   | C6   | C5   | 131.5(7) |
| O1   | Rh1  | Cl2  | 88.40(11)  | C1   | C6   | C5   | 121.9(7) |
| O1   | Rh1  | Cl3  | 89.31(12)  | N1   | C7   | C8   | 122.2(6) |
| N2   | Rh1  | Cl1  | 90.06(15)  | N2   | C7   | N1   | 111.6(6) |
| N2   | Rh1  | Cl2  | 95.64(16)  | N2   | C7   | C8   | 126.2(6) |
| N2   | Rh1  | Cl3  | 90.05(15)  | C7   | C8   | C9   | 120.0(5) |
| N2   | Rh1  | O1   | 175.93(19) | C10  | C8   | C7   | 121.8(6) |
| N2   | Rh1  | O4   | 88.5(2)    | C10  | C8   | C9   | 118.4(6) |
| O4   | Rh1  | Cl1  | 87.01(14)  | O3   | C9   | C8   | 118.2(6) |
| O4   | Rh1  | Cl2  | 175.23(15) | O4   | C9   | O3   | 116.2(6) |
| O4   | Rh1  | Cl3  | 90.81(14)  | O4   | C9   | C8   | 125.6(6) |

|     |     |     |           |     |     |     |          |
|-----|-----|-----|-----------|-----|-----|-----|----------|
| O4  | Rh1 | O1  | 87.44(16) | C8  | C10 | C11 | 122.0(6) |
| C17 | O1  | Rh1 | 121.1(5)  | C10 | C11 | C16 | 123.4(7) |
| C9  | O3  | C12 | 123.0(5)  | C12 | C11 | C10 | 118.6(6) |
| C7  | N1  | C6  | 108.1(6)  | C12 | C11 | C16 | 118.0(7) |
| C1  | N2  | Rh1 | 130.6(4)  | O3  | C12 | C11 | 119.6(6) |
| C7  | N2  | Rh1 | 123.4(4)  | C13 | C12 | O3  | 117.5(6) |
| C7  | N2  | C1  | 105.6(5)  | C13 | C12 | C11 | 122.7(6) |
| C9  | O4  | Rh1 | 124.1(4)  | C12 | C13 | C14 | 118.9(7) |
| C2  | C1  | N2  | 131.2(7)  | C13 | C14 | C15 | 119.7(7) |
| C2  | C1  | C6  | 120.7(7)  | C14 | C15 | Br1 | 119.4(6) |
| C6  | C1  | N2  | 108.0(6)  | C16 | C15 | Br1 | 118.7(6) |
| C1  | C2  | C3  | 116.4(7)  | C16 | C15 | C14 | 121.9(7) |
| C4  | C3  | C2  | 122.6(8)  | C15 | C16 | C11 | 118.8(7) |

**Table S7.** Crystal data and structure refinement details for **RhS**.

|                                                     |                                                                              |
|-----------------------------------------------------|------------------------------------------------------------------------------|
| Empirical formula                                   | C <sub>22</sub> H <sub>25</sub> Cl <sub>3</sub> NO <sub>4</sub> RhS          |
| Formula weight                                      | 608.75                                                                       |
| Crystal system                                      | triclinic                                                                    |
| Space group                                         | <i>P</i> -1                                                                  |
| <i>a</i> /Å                                         | 11.859(1)                                                                    |
| <i>b</i> /Å                                         | 13.461(1)                                                                    |
| <i>c</i> /Å                                         | 15.836(1)                                                                    |
| $\alpha$ /°                                         | 80.727(6)                                                                    |
| $\beta$ /°                                          | 87.740(5)                                                                    |
| $\gamma$ /°                                         | 80.679(6)                                                                    |
| <i>V</i> /Å <sup>3</sup>                            | 2461.8(3)                                                                    |
| <i>Z</i>                                            | 4                                                                            |
| <i>D</i> <sub>c</sub> (g/cm <sup>3</sup> )          | 1.643                                                                        |
| $\mu$ /mm <sup>-1</sup>                             | 1.133                                                                        |
| <i>F</i> (000)                                      | 1232                                                                         |
| Crystal size/mm <sup>3</sup>                        | 0.36 × 0.25 × 0.18                                                           |
| Radiation                                           | MoK $\alpha$ ( $\lambda$ = 0.71073)                                          |
| $\theta$ range for data collection/°                | 3.367 to 25.10                                                               |
| Index ranges                                        | -14 ≤ <i>h</i> ≤ 13, -15 ≤ <i>k</i> ≤ 16, -18 ≤ <i>l</i> ≤ 18                |
| Reflections collected                               | 16384                                                                        |
| Independent reflections                             | 8734 [ <i>R</i> <sub>int</sub> = 0.0370, <i>R</i> <sub>sigma</sub> = 0.0660] |
| Data/restraints/parameters                          | 8734/30/588                                                                  |
| Goodness-of-fit on <i>F</i> <sup>2</sup>            | 1.005                                                                        |
| Final <i>R</i> indexes [ <i>I</i> ≥ 2σ( <i>I</i> )] | <i>R</i> <sub>1</sub> = 0.0502, <i>wR</i> <sub>2</sub> = 0.1146              |
| Final <i>R</i> indexes [all data]                   | <i>R</i> <sub>1</sub> = 0.0805, <i>wR</i> <sub>2</sub> = 0.1396              |

Largest diff. peak/hole / e Å<sup>-3</sup> 0.911/-0.998

$${}^a R_1 = \Sigma ||F_o| - |F_c||/\Sigma|F_o|; {}^b wR_2 = [\Sigma w(F_o^2 - F_c^2)^2/\Sigma w(F_o^2)^2]^{1/2}.$$

**Table S8.** Selected bond lengths (Å) for **RhS**.

| Atom | Atom | Length/Å  | Atom | Atom | Length/Å  |
|------|------|-----------|------|------|-----------|
| Rh1  | C14  | 2.319(2)  | Rh2  | C12  | 2.298(2)  |
| Rh1  | C15  | 2.301(2)  | Rh2  | C13  | 2.313(2)  |
| Rh1  | C16  | 2.345(2)  | Rh2  | O4   | 2.074(4)  |
| Rh1  | O2   | 2.054(4)  | Rh2  | O8   | 2.071(4)  |
| Rh1  | N1   | 2.027(5)  | Rh2  | N2   | 2.022(4)  |
| Rh1  | O7   | 2.055(4)  | S2   | C27  | 1.712(6)  |
| S1   | C6   | 1.721(6)  | S2   | C28  | 1.718(5)  |
| S1   | C7   | 1.730(6)  | O3   | C30  | 1.233(6)  |
| O1   | C9   | 1.336(6)  | O3   | C37  | 1.386(6)  |
| O1   | C16  | 1.392(6)  | O4   | C42  | 1.434(7)  |
| O2   | C21  | 1.414(7)  | O8   | C30  | 1.229(6)  |
| N1   | C9   | 1.228(6)  | N2   | C22  | 1.402(7)  |
| O7   | C1   | 1.407(7)  | N2   | C28  | 1.333(7)  |
| O7   | C7   | 1.320(7)  | C22  | C23  | 1.398(8)  |
| C1   | C2   | 1.394(8)  | C22  | C27  | 1.391(8)  |
| C1   | C6   | 1.387(8)  | C23  | C24  | 1.376(9)  |
| C2   | C3   | 1.375(9)  | C24  | C25  | 1.376(10) |
| C3   | C4   | 1.417(10) | C25  | C26  | 1.390(9)  |
| C4   | C5   | 1.362(10) | C26  | C27  | 1.393(8)  |
| C5   | C6   | 1.416(8)  | C28  | C29  | 1.457(8)  |
| C7   | C8   | 1.457(7)  | C29  | C30  | 1.438(8)  |
| C8   | C9   | 1.444(8)  | C29  | C31  | 1.349(7)  |
| C8   | C10  | 1.351(8)  | C31  | C32  | 1.428(8)  |
| C10  | C11  | 1.432(8)  | C32  | C33  | 1.415(7)  |
| C11  | C12  | 1.422(8)  | C32  | C37  | 1.382(8)  |
| C11  | C16  | 1.386(8)  | C33  | C34  | 1.358(9)  |
| C12  | C13  | 1.358(8)  | C34  | C35  | 1.385(9)  |
| C13  | C14  | 1.380(9)  | C35  | C36  | 1.402(8)  |
| C14  | C15  | 1.386(8)  | C36  | C37  | 1.389(8)  |
| C15  | C16  | 1.394(8)  | C36  | C38  | 1.520(9)  |
| C15  | C17  | 1.525(8)  | C38  | C39  | 1.518(11) |
| C17  | C18  | 1.522(9)  | C38  | C40  | 1.529(10) |
| C17  | C19  | 1.540(10) | C38  | C41  | 1.553(10) |
| C17  | C20  | 1.539(9)  | O5   | C43  | 1.297(12) |

|     |     |          |    |     |          |
|-----|-----|----------|----|-----|----------|
| Rh2 | Cl1 | 2.352(2) | O6 | C44 | 1.315(9) |
|-----|-----|----------|----|-----|----------|

**Table S9.** Selected bond angles (°) for **RhS**.

| Atom | Atom | Atom | Angle/°    | Atom | Atom | Atom | Angle/°    |
|------|------|------|------------|------|------|------|------------|
| C14  | Rh1  | Cl6  | 175.36(6)  | Cl2  | Rh2  | Cl1  | 88.58(6)   |
| C15  | Rh1  | Cl4  | 94.81(6)   | Cl2  | Rh2  | Cl3  | 93.60(6)   |
| C15  | Rh1  | Cl6  | 88.95(6)   | Cl3  | Rh2  | Cl1  | 175.99(7)  |
| O2   | Rh1  | Cl4  | 88.88(15)  | O4   | Rh2  | Cl1  | 87.05(13)  |
| O2   | Rh1  | Cl5  | 85.99(1)   | O4   | Rh2  | Cl2  | 88.61(13)  |
| O2   | Rh1  | Cl6  | 88.66(15)  | O4   | Rh2  | Cl3  | 89.63(14)  |
| N1   | Rh1  | Cl4  | 89.12(12)  | O8   | Rh2  | Cl1  | 86.60(13)  |
| N1   | Rh1  | Cl5  | 173.26(13) | O8   | Rh2  | Cl2  | 173.74(13) |
| N1   | Rh1  | Cl6  | 86.89(12)  | O8   | Rh2  | Cl3  | 90.98(13)  |
| N1   | Rh1  | O2   | 88.61(17)  | O8   | Rh2  | O4   | 87.16(17)  |
| O7   | Rh1  | Cl4  | 90.10(13)  | N2   | Rh2  | Cl1  | 91.94(13)  |
| O7   | Rh1  | Cl5  | 97.10(14)  | N2   | Rh2  | Cl2  | 96.02(14)  |
| O7   | Rh1  | Cl6  | 92.14(13)  | N2   | Rh2  | Cl3  | 91.18(13)  |
| O7   | Rh1  | O2   | 176.82(19) | N2   | Rh2  | O4   | 175.24(18) |
| O7   | Rh1  | N1   | 88.36(17)  | N2   | Rh2  | N3   | 88.14(18)  |
| C6   | S1   | C7   | 89.9(3)    | C27  | S2   | C28  | 90.2(3)    |
| C9   | O1   | C16  | 123.3      | C30  | O3   | C37  | 123.6(4)   |
| C21  | O2   | Rh1  | 124.9(4)   | C42  | O4   | Rh2  | 124.7(4)   |
| C9   | N1   | Rh1  | 119.2(4)   | C30  | O8   | Rh2  | 119.7(4)   |
| C1   | O7   | Rh1  | 128.2(4)   | C22  | N2   | Rh2  | 128.5(4)   |
| C7   | O7   | Rh1  | 119.7(4)   | C28  | N2   | Rh2  | 120.0(4)   |
| C7   | O7   | C1   | 112.1(5)   | C28  | N2   | C22  | 111.2(5)   |
| C2   | C1   | O7   | 127.1(5)   | C23  | C22  | N2   | 126.8(6)   |
| C6   | C1   | O7   | 112.6(5)   | C27  | C22  | N2   | 113.0(5)   |
| C6   | C1   | C2   | 120.2(6)   | C27  | C22  | C23  | 120.1(6)   |
| C3   | C2   | C1   | 118.4(6)   | C24  | C23  | C22  | 117.4(6)   |
| C2   | C3   | C4   | 121.2(6)   | C23  | C24  | C25  | 122.9(7)   |
| C5   | C4   | C3   | 120.9(6)   | C24  | C25  | C26  | 120.1(6)   |
| C4   | C5   | C6   | 117.7(7)   | C25  | C26  | C27  | 117.8(7)   |
| C1   | C6   | S1   | 111.2(5)   | C22  | C27  | S2   | 111.0(4)   |
| C1   | C6   | C5   | 121.5(6)   | C22  | C27  | C26  | 121.4(6)   |
| C5   | C6   | S1   | 127.3(5)   | C26  | C27  | S2   | 127.5(5)   |
| O7   | C7   | S1   | 114.1(4)   | N2   | C28  | S2   | 114.4(4)   |
| O7   | C7   | C8   | 127.1(5)   | N2   | C28  | C29  | 126.5(5)   |
| C8   | C7   | S1   | 118.8(4)   | C29  | C28  | S2   | 119.1(4)   |

|     |     |     |          |     |     |     |          |
|-----|-----|-----|----------|-----|-----|-----|----------|
| C9  | C8  | C7  | 119.2(5) | C30 | C29 | C28 | 120.4(5) |
| C10 | C8  | C7  | 122.2(5) | C31 | C29 | C28 | 120.2(5) |
| C10 | C8  | C9  | 118.3(5) | C31 | C29 | C30 | 119.1(5) |
| O1  | C9  | C8  | 119.6(4) | O3  | C30 | C29 | 118.8(4) |
| N1  | C9  | O1  | 114.3(5) | O8  | C30 | O3  | 126.4(5) |
| N1  | C9  | C8  | 126.2(5) | O8  | C30 | C29 | 126.5(5) |
| C8  | C10 | C11 | 121.3(5) | C29 | C31 | C32 | 121.0(5) |
| C12 | C11 | C10 | 121.7(5) | C33 | C32 | C31 | 121.9(5) |
| C16 | C11 | C10 | 119.4(5) | C37 | C32 | C31 | 119.0(5) |
| C16 | C11 | C12 | 118.9(5) | C37 | C32 | C33 | 119.1(5) |
| C13 | C12 | C11 | 117.7(6) | C34 | C33 | C32 | 118.6(6) |
| C12 | C13 | C14 | 120.9(6) | C33 | C34 | C35 | 120.8(6) |
| C13 | C14 | C15 | 124.6(6) | C34 | C35 | C36 | 123.0(6) |
| C14 | C15 | C16 | 113.3(6) | C35 | C36 | C38 | 123.4(6) |
| C14 | C15 | C17 | 123.3(6) | C37 | C36 | C35 | 114.7(6) |
| C16 | C15 | C17 | 123.3(5) | C37 | C36 | C38 | 121.8(5) |
| O1  | C16 | C15 | 117.5(5) | C32 | C37 | O3  | 118.4(5) |
| C11 | C16 | O1  | 118.1(5) | C32 | C37 | C36 | 123.8(5) |
| C11 | C16 | C15 | 124.5(5) | C36 | C37 | O3  | 117.8(5) |
| C15 | C17 | C19 | 108.7(6) | C36 | C38 | C39 | 110.2(6) |
| C15 | C17 | C20 | 111.1(5) | C36 | C38 | C40 | 111.1(6) |
| C18 | C17 | C15 | 111.4(5) | C36 | C38 | C41 | 110.5(6) |
| C18 | C17 | C19 | 110.3(6) | C39 | C38 | C40 | 110.6(6) |
| C18 | C17 | C20 | 107.2(6) | C39 | C38 | C41 | 107.5(7) |
| C19 | C17 | C20 | 108.2(6) | C40 | C38 | C41 | 106.8(7) |

**Table S10.** Crystal data and structure refinement details for **RhQ**.

|                                            |                                                                                   |
|--------------------------------------------|-----------------------------------------------------------------------------------|
| Empirical formula                          | C <sub>24</sub> H <sub>26</sub> Cl <sub>3</sub> N <sub>2</sub> O <sub>2</sub> RhS |
| Formula weight                             | 615.79                                                                            |
| Crystal system                             | triclinic                                                                         |
| Space group                                | <i>P</i> -1                                                                       |
| <i>a</i> /Å                                | 8.3861(3)                                                                         |
| <i>b</i> /Å                                | 11.4423(4)                                                                        |
| <i>c</i> /Å                                | 13.9193(5)                                                                        |
| $\alpha$ /°                                | 78.158(1)                                                                         |
| $\beta$ /°                                 | 88.814(1)                                                                         |
| $\gamma$ /°                                | 80.093(1)                                                                         |
| <i>V</i> /Å <sup>3</sup>                   | 1287.58(8)                                                                        |
| <i>Z</i>                                   | 2                                                                                 |
| <i>D</i> <sub>c</sub> (g/cm <sup>3</sup> ) | 1.588                                                                             |
| $\mu$ /mm <sup>-1</sup>                    | 1.080                                                                             |



|                                               |                                                               |
|-----------------------------------------------|---------------------------------------------------------------|
| $F(000)$                                      | 624                                                           |
| Crystal size/mm <sup>3</sup>                  | 0.20 × 0.09 × 0.05                                            |
| Radiation                                     | MoK $\alpha$ ( $\lambda = 0.71073$ )                          |
| $\theta$ range for data collection/ $^\circ$  | 2.99 to 25.10                                                 |
| Index ranges                                  | $-10 \leq h \leq 10, -13 \leq k \leq 13, -16 \leq l \leq 16$  |
| Reflections collected                         | 23527                                                         |
| Independent reflections                       | 4579 [ $R_{\text{int}} = 0.0338, R_{\text{sigma}} = 0.0290$ ] |
| Data/restraints/parameters                    | 4579/0/303                                                    |
| Goodness-of-fit on $F^2$                      | 1.007                                                         |
| Final R indexes [ $I \geq 2\sigma(I)$ ]       | $R_1 = 0.0242, wR_2 = 0.0549$                                 |
| Final R indexes [all data]                    | $R_1 = 0.0345, wR_2 = 0.0584$                                 |
| Largest diff. peak/hole / e $\text{\AA}^{-3}$ | 0.474/-0.551                                                  |

$$^a R_1 = \Sigma ||F_o| - |F_c||/\Sigma|F_o|; ^b wR_2 = [\Sigma w(F_o^2 - F_c^2)^2/\Sigma w(F_o^2)^2]^{1/2}.$$

**Table S11.** Selected bond lengths ( $\text{\AA}$ ) for **RhQ**.

| Atom | Atom | Length/ $\text{\AA}$ | Atom | Atom | Length/ $\text{\AA}$ |
|------|------|----------------------|------|------|----------------------|
| Rh1  | S1   | 2.2615(6)            | C9   | C10  | 1.486(3)             |
| Rh1  | C13  | 2.3313(6)            | C9   | C8   | 1.415(3)             |
| Rh1  | C11  | 2.3573(6)            | C19  | C17  | 1.534(3)             |
| Rh1  | C12  | 2.3596(6)            | C19  | C22  | 1.530(4)             |
| Rh1  | N2   | 2.0123(18)           | C10  | C12  | 1.349(3)             |
| Rh1  | N1   | 2.1357(18)           | C13  | C14  | 1.399(3)             |
| S1   | O2   | 1.4732(17)           | C13  | C12  | 1.429(3)             |
| S1   | C23  | 1.770(2)             | C17  | C16  | 1.391(4)             |
| S1   | C24  | 1.765(3)             | C14  | C15  | 1.372(4)             |
| O1   | C18  | 1.380(3)             | C1   | C6   | 1.417(3)             |
| O1   | C11  | 1.352(3)             | C1   | C2   | 1.404(3)             |
| N2   | C11  | 1.277(3)             | C6   | C5   | 1.416(3)             |
| N1   | C9   | 1.339(3)             | C6   | C7   | 1.390(4)             |
| N1   | C1   | 1.398(3)             | C5   | C4   | 1.343(4)             |
| C18  | C13  | 1.389(3)             | C8   | C7   | 1.349(3)             |
| C18  | C17  | 1.395(3)             | C16  | C15  | 1.382(4)             |
| C11  | C10  | 1.444(3)             | C2   | C3   | 1.369(3)             |
| C21  | C19  | 1.532(4)             | C4   | C3   | 1.394(4)             |
| C20  | C19  | 1.525(4)             |      |      |                      |

**Table S12.** Selected bond angles ( $^\circ$ ) for **RhQ**.

| Atom | Atom | Atom | Angle/°    | Atom | Atom | Atom | Angle/°  |
|------|------|------|------------|------|------|------|----------|
| S1   | Rh1  | C13  | 92.27(2)   | N1   | C9   | C8   | 121.3(2) |
| S1   | Rh1  | C11  | 86.96(2)   | C8   | C9   | C10  | 115.3(2) |
| S1   | Rh1  | C12  | 86.98(2)   | C21  | C19  | C17  | 111.0(2) |
| C13  | Rh1  | C11  | 86.89(2)   | C20  | C19  | C21  | 109.6(2) |
| C13  | Rh1  | C12  | 175.69(2)  | C20  | C19  | C17  | 109.8(2) |
| C11  | Rh1  | C12  | 97.30(2)   | C20  | C19  | C22  | 107.1(2) |
| N2   | Rh1  | S1   | 87.63(5)   | C22  | C19  | C21  | 107.6(2) |
| N2   | Rh1  | C13  | 89.15(6)   | C22  | C19  | C17  | 111.7(2) |
| N2   | Rh1  | C11  | 173.16(6)  | C11  | C10  | C9   | 122.0(2) |
| N2   | Rh1  | C12  | 86.57(6)   | C12  | C10  | C11  | 116.3(2) |
| N2   | Rh1  | N1   | 86.99(7)   | C12  | C10  | C9   | 121.6(2) |
| N1   | Rh1  | S1   | 174.59(5)  | C18  | C13  | C14  | 118.6(2) |
| N1   | Rh1  | C13  | 88.08(5)   | C18  | C13  | C12  | 118.9(2) |
| N1   | Rh1  | C11  | 98.44(5)   | C14  | C13  | C12  | 122.5(2) |
| N1   | Rh1  | C12  | 92.27(5)   | C18  | C17  | C19  | 123.8(2) |
| O2   | S1   | Rh1  | 111.88(7)  | C16  | C17  | C18  | 114.0(2) |
| O2   | S1   | C23  | 108.10(12) | C16  | C17  | C19  | 122.2(2) |
| O2   | S1   | C24  | 108.19(12) | C15  | C14  | C13  | 118.9(3) |
| C23  | S1   | Rh1  | 113.52(9)  | N1   | C1   | C6   | 120.5(2) |
| C24  | S1   | Rh1  | 113.40(9)  | N1   | C1   | C2   | 121.4(2) |
| C24  | S1   | C23  | 101.06(14) | C2   | C1   | C6   | 118.0(2) |
| C11  | O1   | C18  | 122.64(17) | C5   | C6   | C1   | 119.2(2) |
| C11  | N2   | Rh1  | 121.41(15) | C7   | C6   | C1   | 118.6(2) |
| C9   | N1   | Rh1  | 119.46(14) | C7   | C6   | C5   | 122.0(2) |
| C9   | N1   | C1   | 118.56(19) | C4   | C5   | C6   | 121.2(3) |
| C1   | N1   | Rh1  | 121.84(15) | C7   | C8   | C9   | 120.5(2) |
| O1   | C18  | C13  | 118.1(2)   | C10  | C12  | C13  | 122.8(2) |
| O1   | C18  | C17  | 117.4(2)   | C8   | C7   | C6   | 119.9(2) |
| C13  | C18  | C17  | 124.5(2)   | C15  | C16  | C17  | 123.6(3) |
| O1   | C11  | C10  | 120.14(19) | C3   | C2   | C1   | 120.4(2) |
| N2   | C11  | O1   | 115.45(19) | C14  | C15  | C16  | 120.5(3) |
| N2   | C11  | C10  | 124.4(2)   | C5   | C4   | C3   | 119.6(2) |
| N1   | C9   | C10  | 123.25(19) | C2   | C3   | C4   | 121.3(3) |

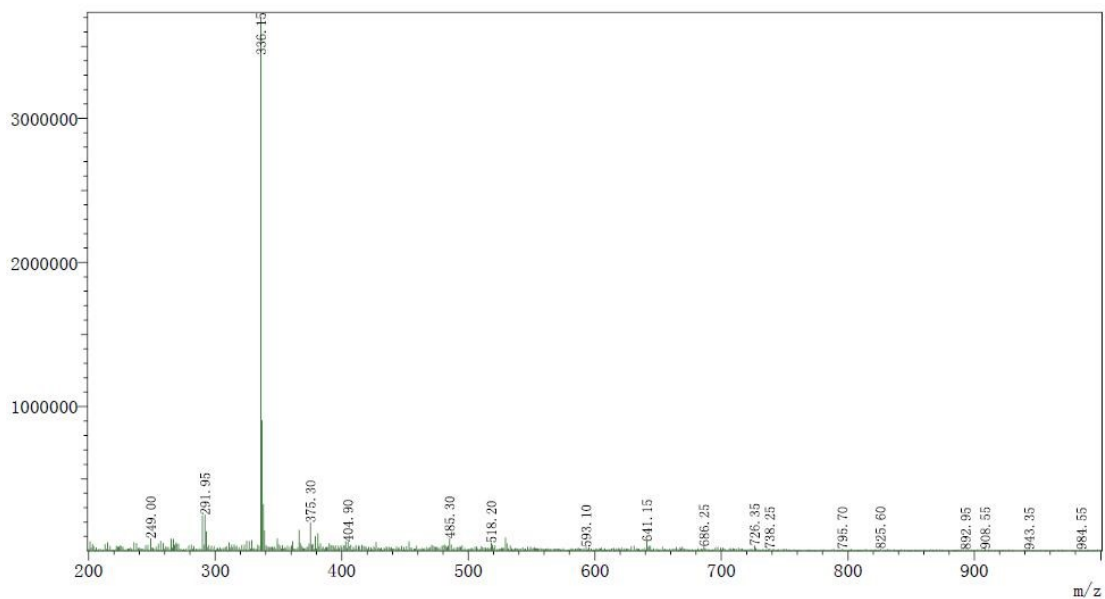

**Figure S1.** ESI-MS spectra of QB3a ( $2.0 \times 10^{-5}$  M) in Tris-HCl buffer solution (containing 5% DMSO) for 0 h.

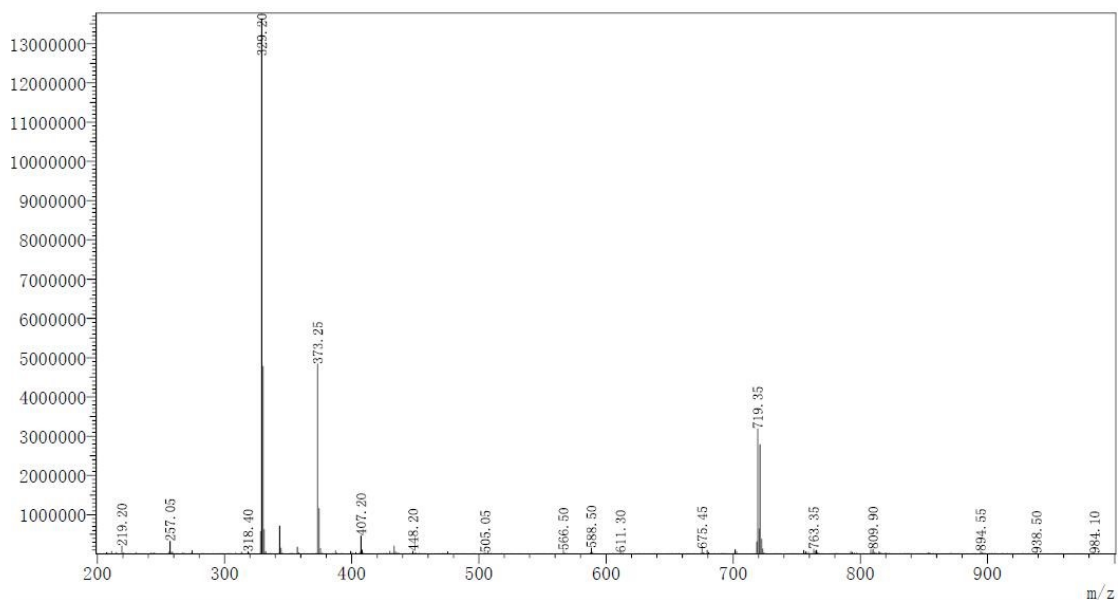

**Figure S2.** ESI-MS spectra of QB4 ( $2.0 \times 10^{-5}$  M) in Tris-HCl buffer solution (containing 5% DMSO) for 0 h.

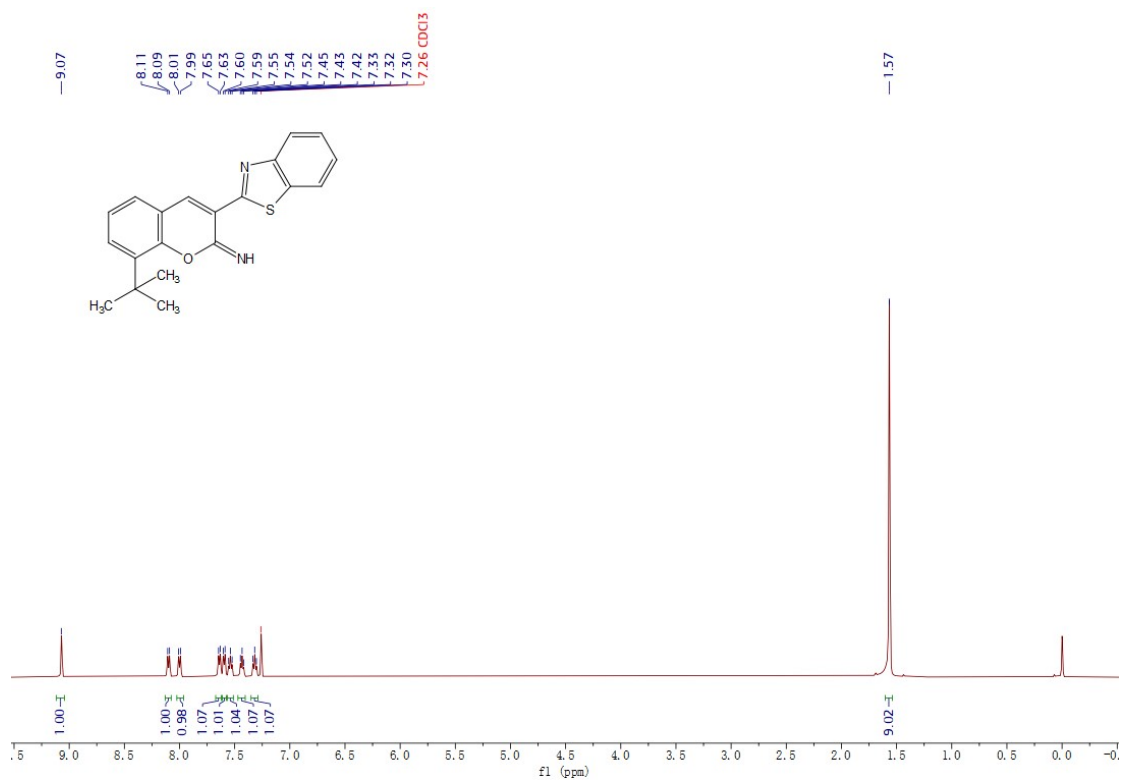

**Figure S3.** <sup>1</sup>H NMR (500MHz, DMSO-d<sub>6</sub>) for QB3a.

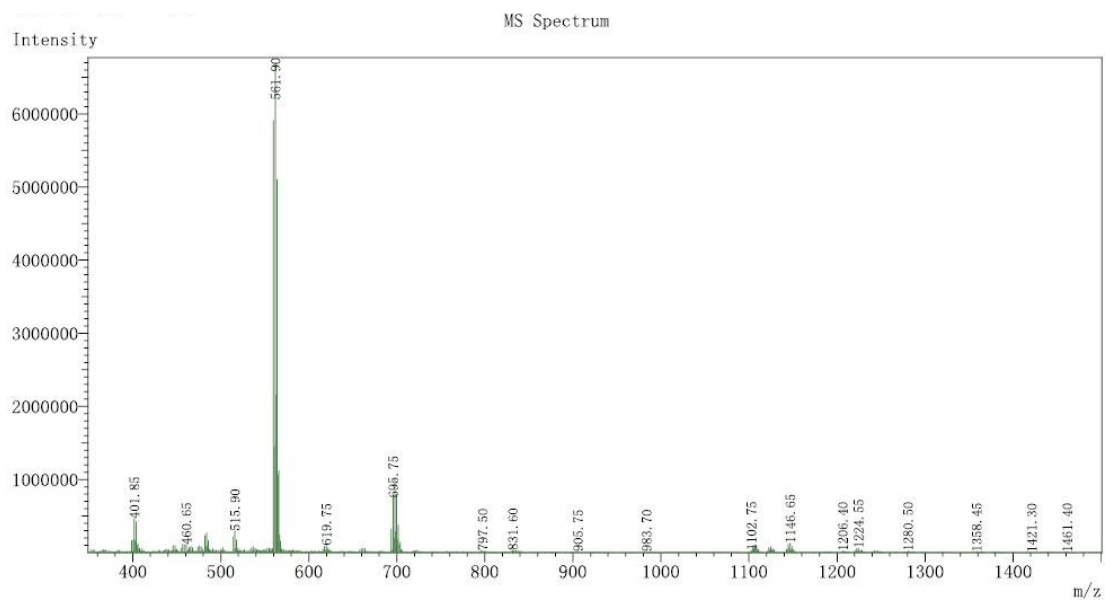

**Figure S4.** ESI-MS spectra of RhN1 ( $2.0 \times 10^{-5}$  M) in Tris-HCl buffer solution (containing 5% DMSO) for 0 h.

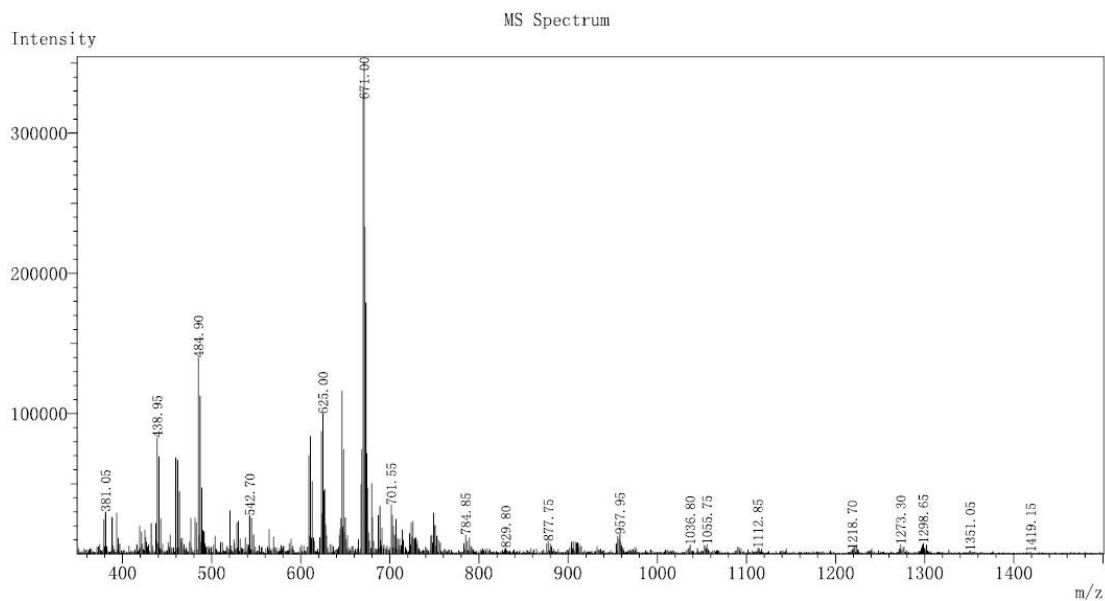

**Figure S5.** ESI-MS spectra of **RhN2** ( $2.0 \times 10^{-5}$  M) in Tris-HCl buffer solution (containing 5% DMSO) for 0 h.

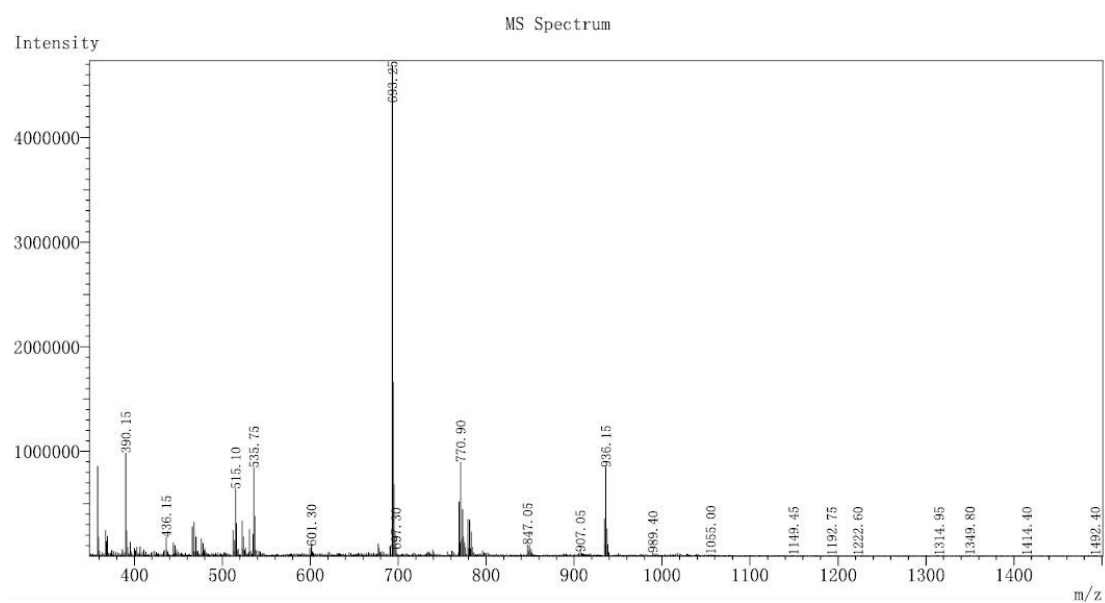

**Figure S6.** ESI-MS spectra of **RhS** ( $2.0 \times 10^{-5}$  M) in Tris-HCl buffer solution (containing 5% DMSO) for 0 h.

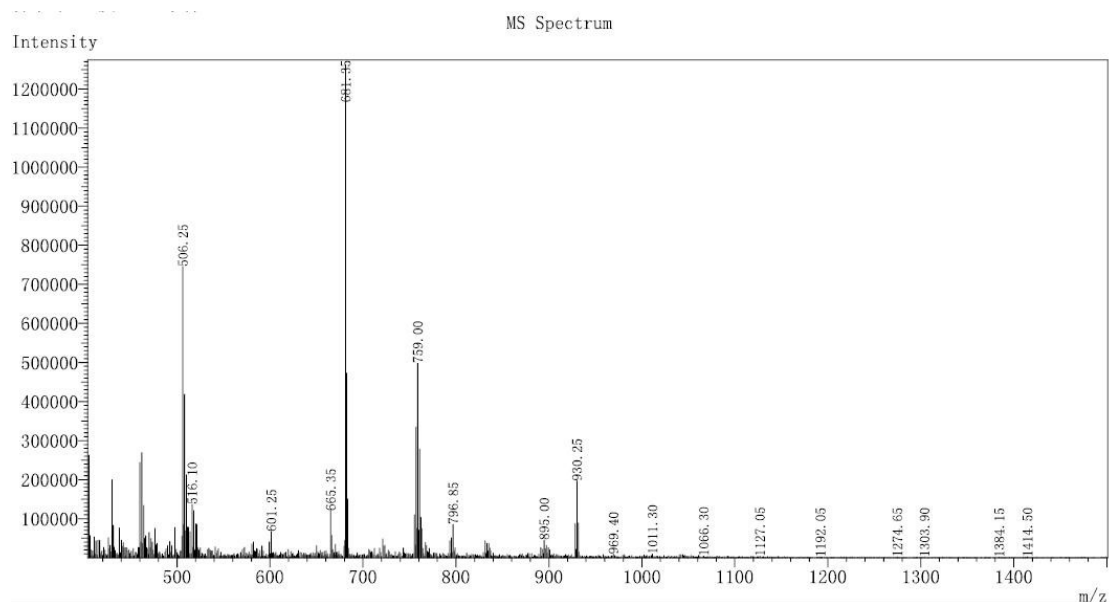

**Figure S7.** ESI-MS spectra of **RhQ** ( $2.0 \times 10^{-5}$  M) in Tris-HCl buffer solution (containing 5% DMSO) for 0 h.

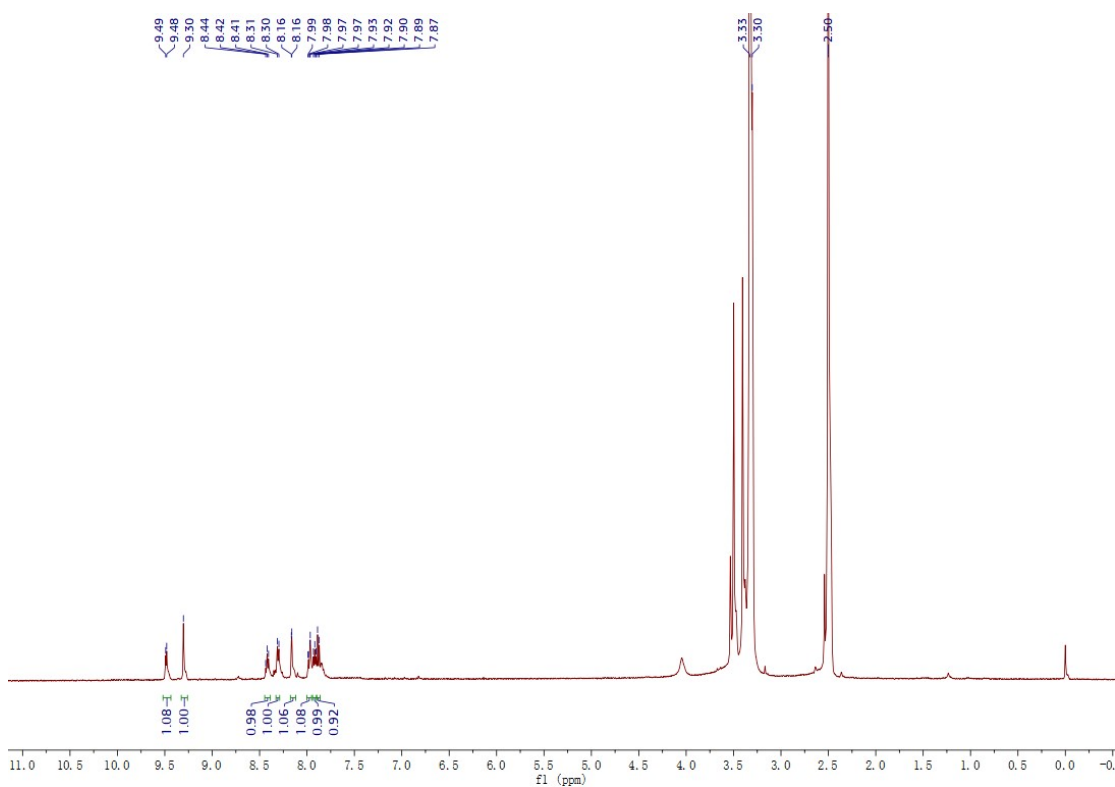

**Figure S8.**  $^1\text{H}$  NMR (500MHz, DMSO- $d_6$ ) for **RhN1**.

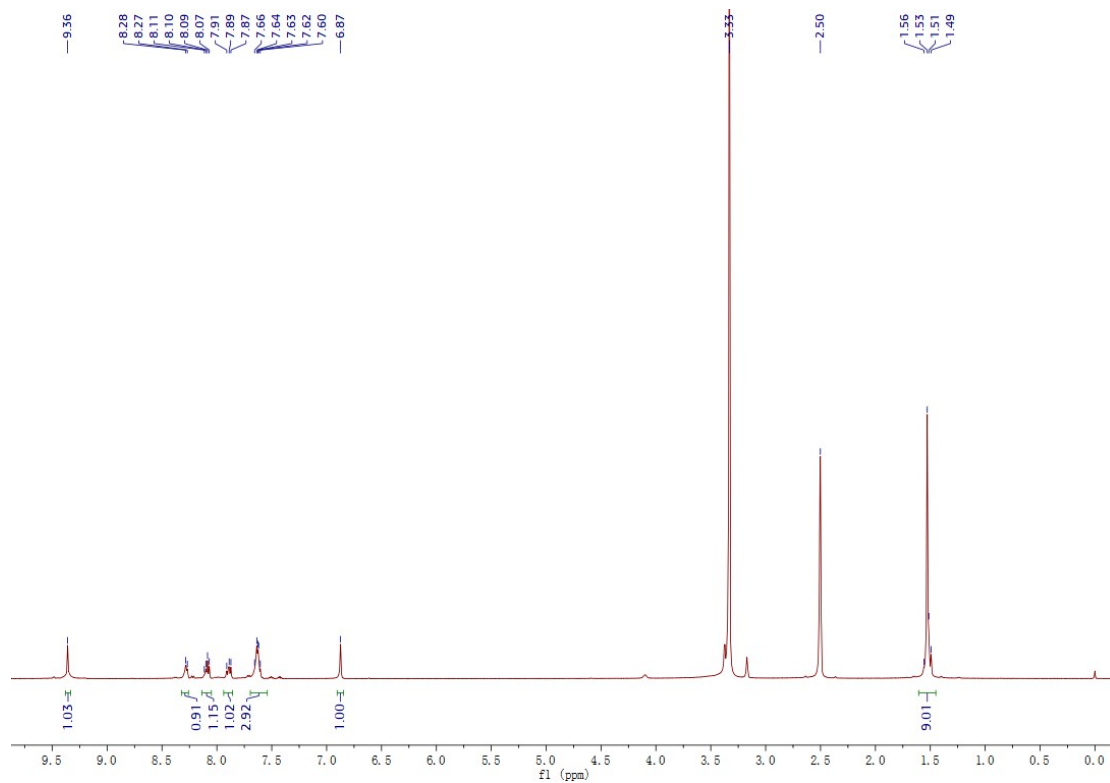

**Figure S9.**  $^1\text{H}$  NMR (500MHz,  $\text{DMSO-d}_6$ ) for **RhS**.

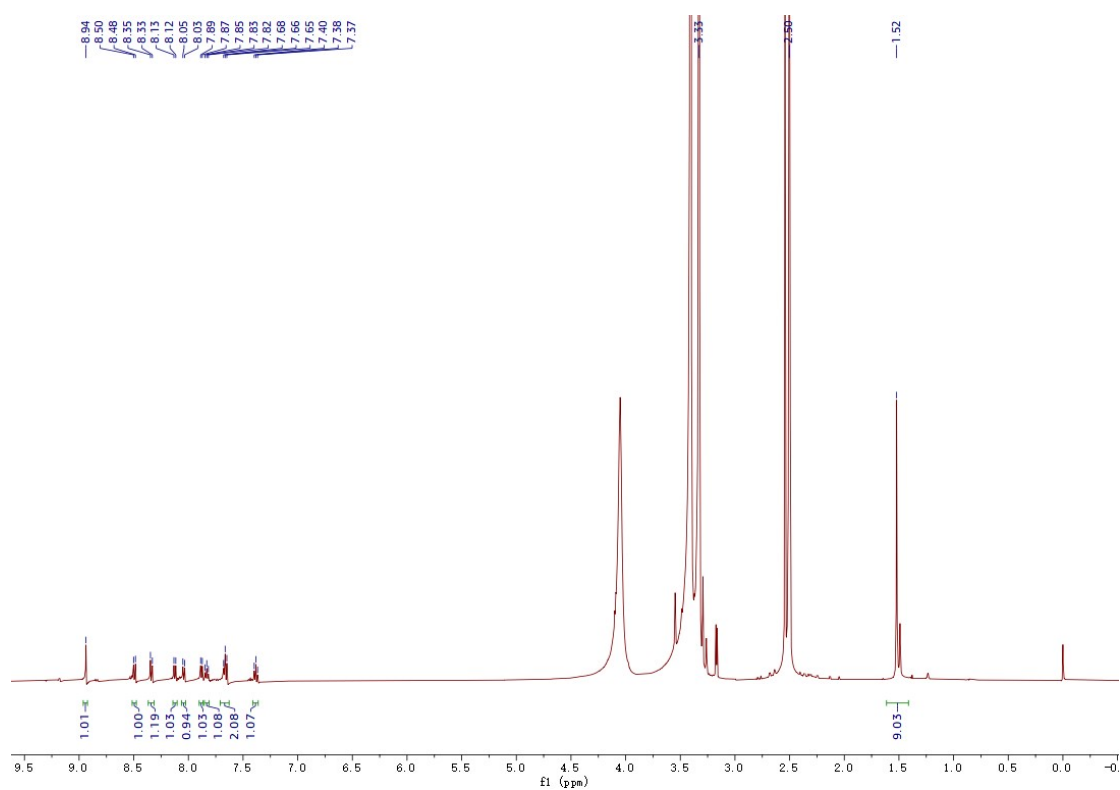

**Figure S10.**  $^1\text{H}$  NMR (500MHz,  $\text{DMSO-d}_6$ ) for **RhQ**.

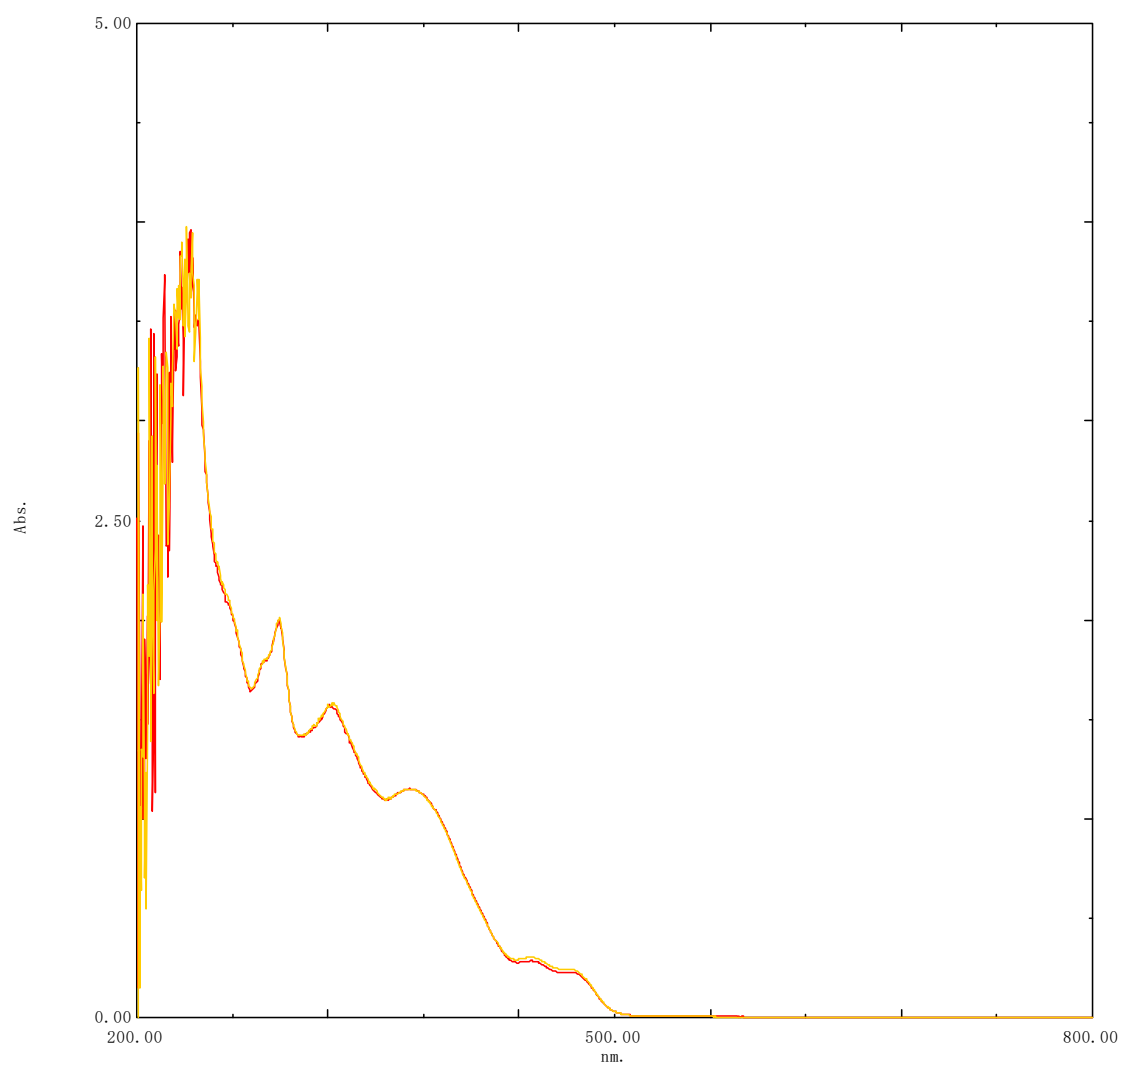

**Figure S11.** UV-Vis absorption spectra of **RhQ** ( $2.0 \times 10^{-5}$  M) in Tris-HCl solution in the time course 0 h (yellow) and 24 h (red), respectively.



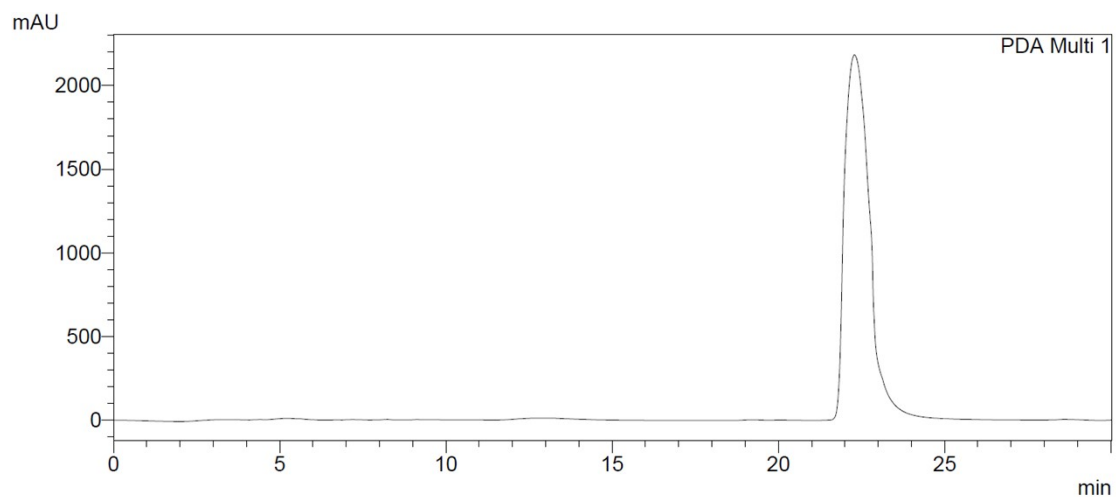

1 PDA Multi 1/254nm 4nm

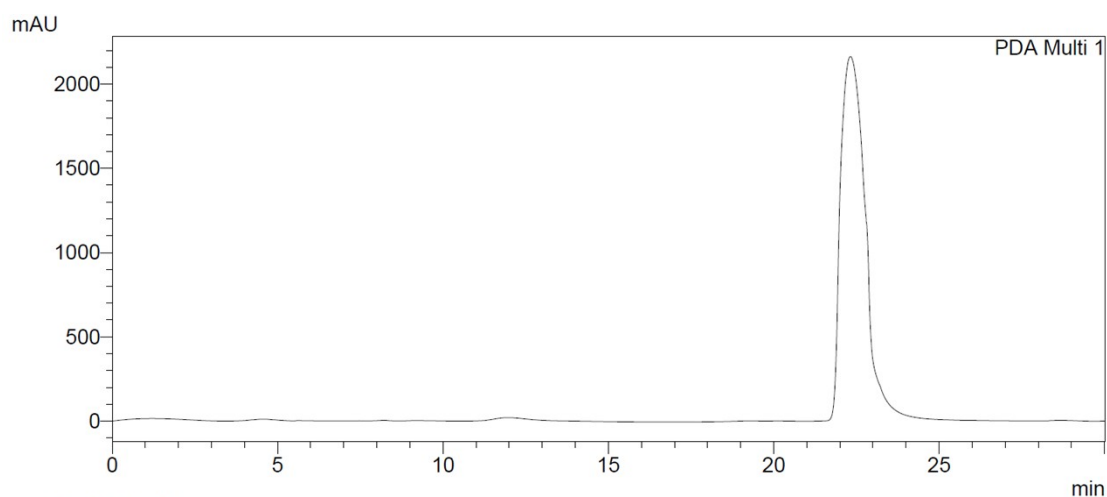

1 PDA Multi 1/254nm 4nm

**Figure S12.** HPLC spectra for **RhS** ( $2.0 \times 10^{-5}$  M) in TBS (Tris-HCl buffer solution, 10 mM, pH 7.35) solution with 0 h (up) and 24 h (down). Column: Inertsustain C18 column (LC-20AT, SPD-20A HPLC COLUMN, 150mm $\times$ 5.0  $\mu$ m I.D.). Column temperature: 40°C. Mobile phase: methol/H<sub>2</sub>O containing 0.01% TFA (90:10 methol/H<sub>2</sub>O). Flow rate: 0.4 mL/min. Injection volume:  $2.0 \times 10^{-5}$  M.

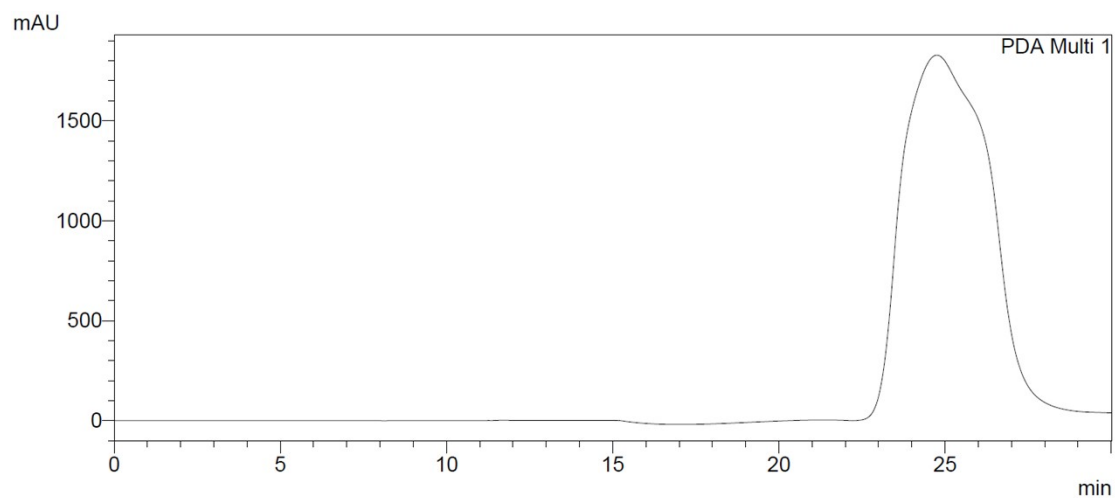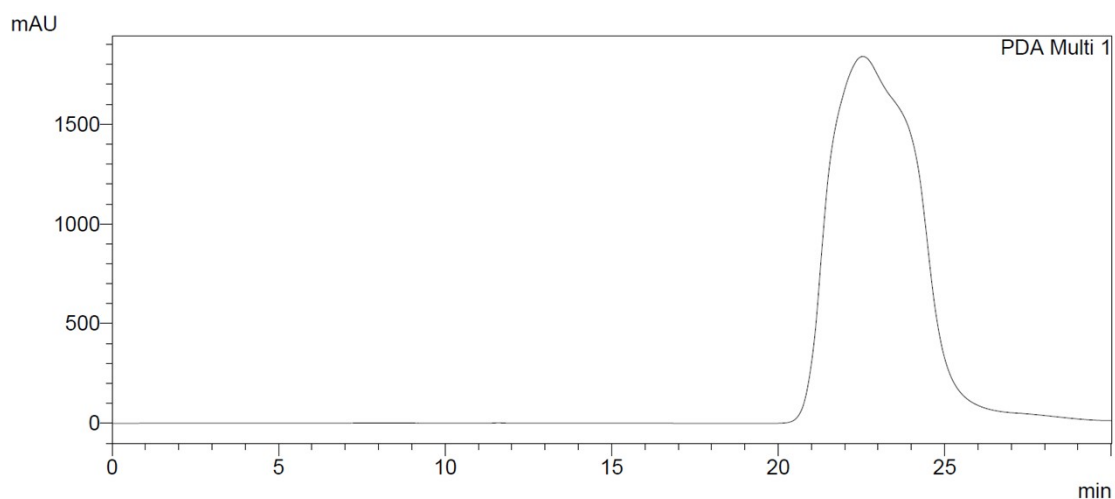

**Figure S13.** HPLC spectra for **RhQ** ( $2.0 \times 10^{-5}$  M) in TBS (Tris-HCl buffer solution, 10 mM, pH 7.35) solution with 0 h (up) and 24 h (down). Column: Inertsustain C18 column (LC-20AT, SPD-20A HPLC COLUMN, 150mm $\times$ 5.0  $\mu$ m I.D.). Column temperature: 40°C. Mobile phase: methol/H<sub>2</sub>O containing 0.01% TFA (90:10 methol/H<sub>2</sub>O). Flow rate: 0.4 mL/min. Injection volume:  $2.0 \times 10^{-5}$  M.

<Chromatogram>

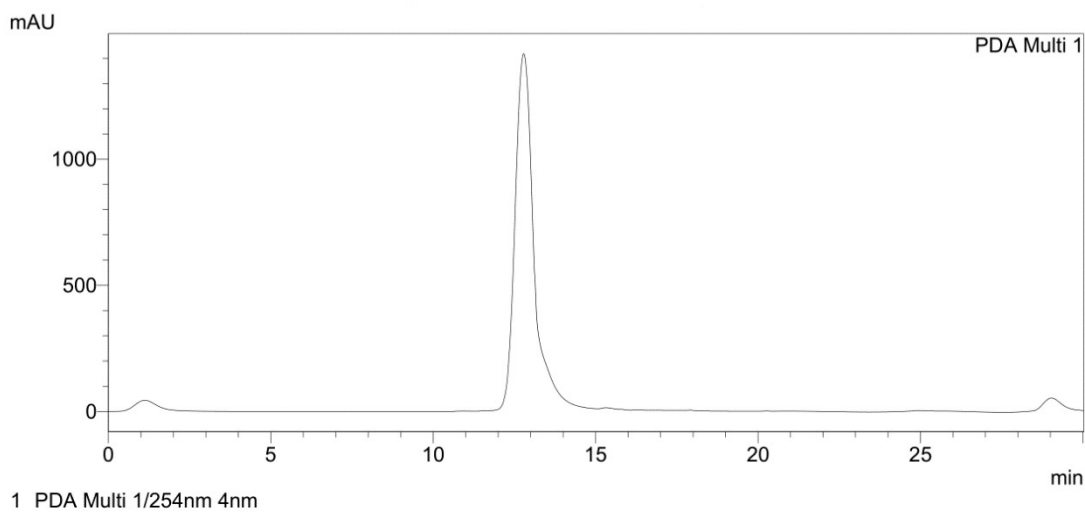

**Figure S14.** HPLC spectra for QB4 ligand ( $2.0 \times 10^{-5}$  M) in TBS (Tris-HCl buffer solution, 10 mM, pH 7.35) solution with 0 h. Column: Inertsustain C18 column (LC-20AT, SPD-20A HPLC COLUMN, 150mm $\times$ 5.0  $\mu$ m I.D.). Column temperature: 40°C. Mobile phase: methol/H<sub>2</sub>O containing 0.01% TFA (90:10 methol/H<sub>2</sub>O). Flow rate: 0.4 mL/min. Injection volume:  $2.0 \times 10^{-5}$  M.

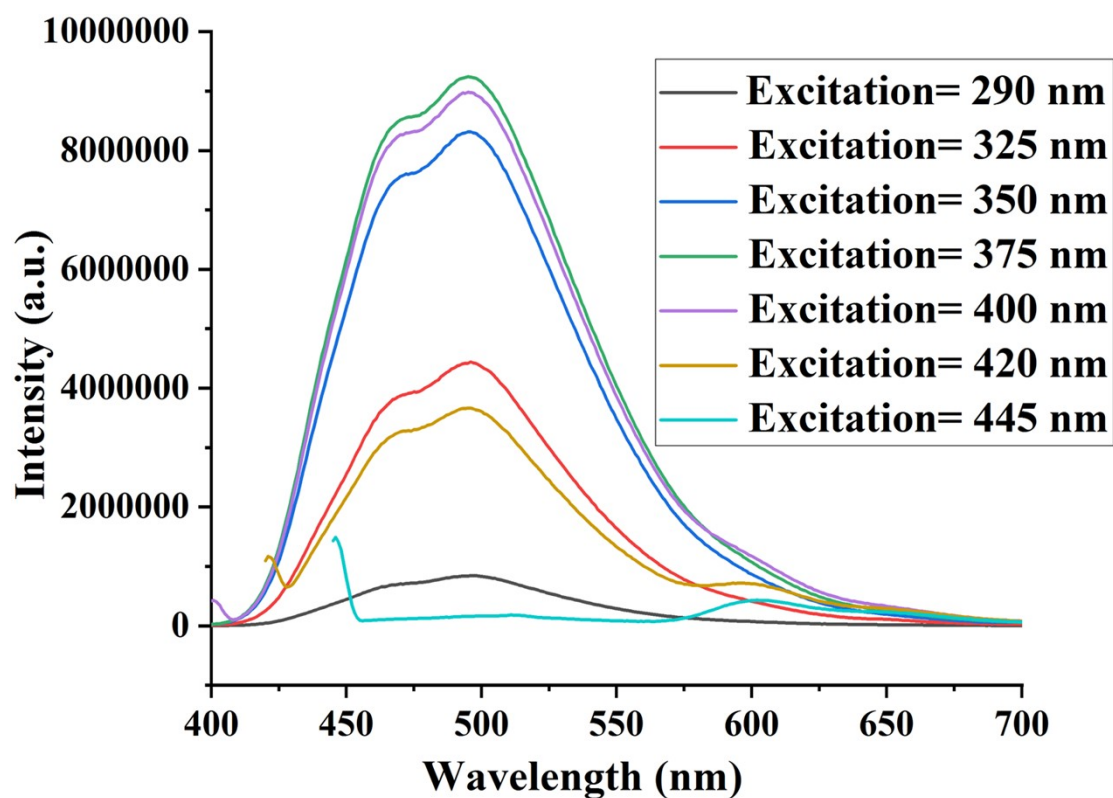

**Figure S15.** Fluorescence spectra of RhQ ( $2.0 \times 10^{-5}$  M) recorded in Tris-HCl solution containing DMSO (1%v/v) followed by excitation at 290, 325, 350, 375, 400, 420 and 445 nm.

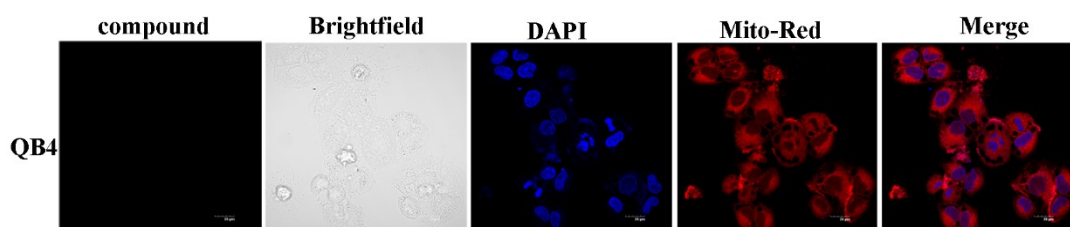

**Figure S16.** The colocalization of QB4 ( $39.8 \mu\text{M}$ ) in A549CDDP cells for 24 h with DAPI and Mito-Red by confocal microscopy. The  $\lambda_{\text{ex}} = 375$  nm and  $\lambda_{\text{em}} = 500\text{--}540$  nm values of QB4.

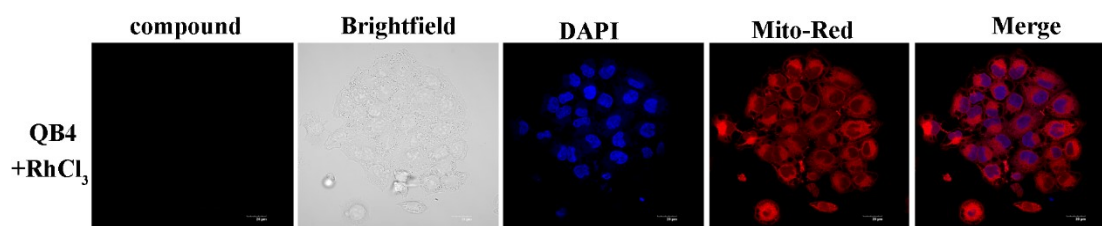

**Figure S17.** The colocalization of the mixed compounds (QB4 ( $0.08 \mu\text{M}$ )+

RhCl<sub>3</sub>·3H<sub>2</sub>O (0.08 μM) in A549CDDP cells for 24 h with DAPI and Mito-Red by confocal microscopy. The  $\lambda_{\text{ex}} = 375 \text{ nm}$  and  $\lambda_{\text{em}} = 500\text{--}540\text{nm}$  values of this mixed compounds.

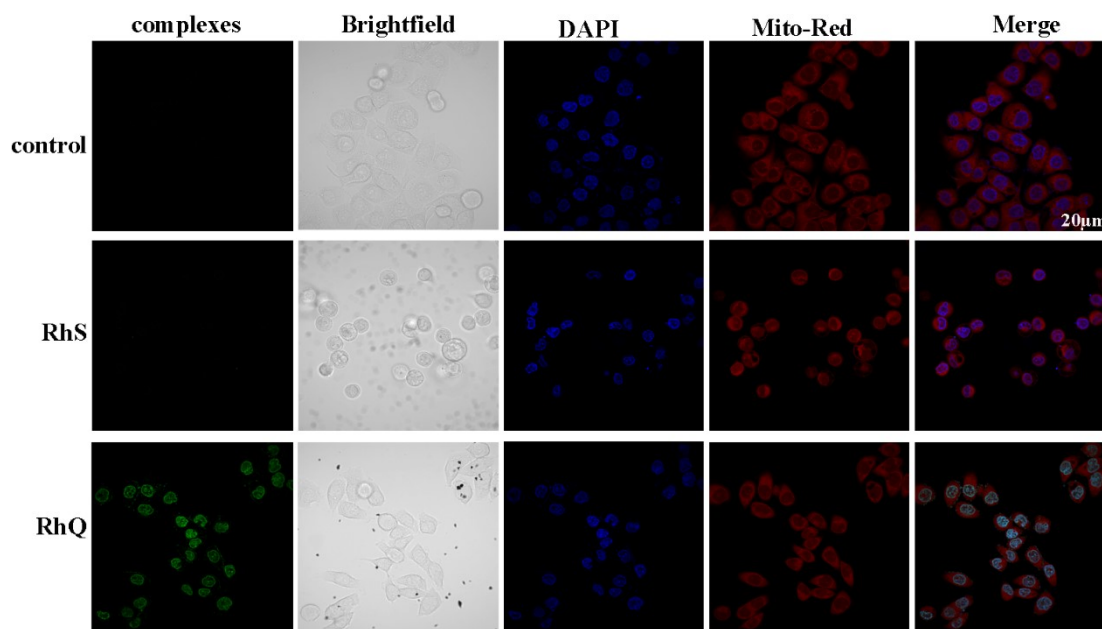

**Figure S18.** The colocalization of **RhS** (0.7 μM) and **RhQ** (0.08 μM) in A549CDDP cells for 24 h with DAPI and Mito-Red by confocal microscopy. The  $\lambda_{\text{ex}} = 375 \text{ nm}$  and  $\lambda_{\text{em}} = 500\text{--}540\text{nm}$  values of **RhS** and **RhQ**.

**Table S13.** RhS and RhQ induced DNA damage in A549CDDP cells.

| Name       | Head Area | Tail Area | Head DNA | Tail DNA | Head DNA% | Tail DNA% | Head Radius | Tail Length | Comet Length | Head MeanX | Tail MeanX | Tail Moment | Olive Tail Moment |
|------------|-----------|-----------|----------|----------|-----------|-----------|-------------|-------------|--------------|------------|------------|-------------|-------------------|
| control    | 2677      | 405       | 298.3    | 10.0     | 96.7      | 3.3       | 29          | 7           | 66           | 63.9       | 91.3       | 0.2         | 0.9               |
| <b>RhQ</b> | 1158      | 2840      | 194.9    | 173.2    | 52.9      | 47.1      | 19          | 99          | 138          | 51.2       | 93.5       | 46.6        | 19.9              |
| <b>RhS</b> | 892       | 1364      | 178.5    | 85.2     | 67.7      | 32.3      | 18          | 65          | 102          | 47.7       | 80.1       | 21.0        | 10.5              |

**Table S14.** The tumor volume in treated and non-treated mice from the date of surgery to the study end point in the A549CDDP xenograft model.

|            | mg/kg | 1day (d)                        | 3d                              |             |       | 5d                              |             |       | 7d                              |               |       |
|------------|-------|---------------------------------|---------------------------------|-------------|-------|---------------------------------|-------------|-------|---------------------------------|---------------|-------|
|            |       | Tumor Volume (mm <sup>3</sup> ) | Tumor Volume (mm <sup>3</sup> ) | RTV         | T/C%  | Tumor Volume (mm <sup>3</sup> ) | RTV         | T/C%  | Tumor Volume (mm <sup>3</sup> ) | RTV           | T/C%  |
| Control    | –     | 90.4±5.1                        | 169.6±30.3                      | 1.881±0.352 | 100.0 | 314.1±82.9                      | 3.494±0.993 | 100.0 | 527.4±51.7                      | 5.853±0.689   | 100.0 |
| <b>RhS</b> | 5.0   | 90.2±5.4                        | 166.4±20.2                      | 1.845±0.186 | 98.1  | 283.0±38.5                      | 3.161±0.601 | 90.1  | 439.6±59.0*                     | 4.891±0.742*  | 83.4  |
| <b>RhQ</b> | 5.0   | 90.9±6.1                        | 158.0±10.4                      | 1.745±0.181 | 93.2  | 267.9±17.5                      | 2.951±0.182 | 84.5  | 384.6±12.5**                    | 4.237±0.146** | 72.9  |

|            | mg/kg | 9d                              |               |       | 11d                             |               |       | 13d                             |               |       |
|------------|-------|---------------------------------|---------------|-------|---------------------------------|---------------|-------|---------------------------------|---------------|-------|
|            |       | Tumor Volume (mm <sup>3</sup> ) | RTV           | T/C%  | Tumor Volume (mm <sup>3</sup> ) | RTV           | T/C%  | Tumor Volume (mm <sup>3</sup> ) | RTV           | T/C%  |
| Control    | –     | 765.1±54.9                      | 8.462±0.448   | 100.0 | 973.7±71.3                      | 10.768±0.481  | 100.0 | 1220.1±135.0                    | 13.502±1.437  | 100.0 |
| <b>RhS</b> | 5.0   | 586.6±83.9**                    | 6.510±0.879** | 76.7  | 669.9±57.8**                    | 7.436±0.581** | 68.8  | 741.5±37.9**                    | 8.236±0.457** | 60.8  |
| <b>RhQ</b> | 5.0   | 516.8±34.8**                    | 5.697±0.440** | 67.5  | 582.9±23.7**                    | 6.430±0.435** | 59.9  | 614.1±23.2**                    | 6.773±0.424** | 50.3  |

|            | mg/kg | 15d                             |               |       |
|------------|-------|---------------------------------|---------------|-------|
|            |       | Tumor Volume (mm <sup>3</sup> ) | RTV           | T/C%  |
| Control    | –     | 1427.8±155.9                    | 15.789±2.223  | 100.0 |
| <b>RhS</b> | 5.0   | 765.8±43.0**                    | 8.504±0.470** | 53.6  |
| <b>RhQ</b> | 5.0   | 633.6±27.1**                    | 6.989±0.480** | 44.4  |

\*  $p < 0.05$ , \*\*  $p < 0.01$ ,  $p$  vs vehicle control (5.0% v/v DMSO/ saline vehicle).

**Table S15.** Average body weight in treated and non-treated mice from the date of surgery to the study end point in the A549CDDP xenograft model.

|            | mg/kg | 1 d      | 3 d      | 5 d      | 7 d      | 9 d      | 11 d     | 13 d     | 15 d     |
|------------|-------|----------|----------|----------|----------|----------|----------|----------|----------|
| Control    | –     | 19.8±0.5 | 19.9±0.5 | 20.1±0.5 | 20.2±0.5 | 20.4±0.5 | 20.5±0.5 | 20.7±0.5 | 20.8±0.6 |
| <b>RhS</b> | 5.0   | 19.7±0.6 | 19.8±0.6 | 20.0±0.6 | 20.2±0.6 | 20.4±0.6 | 20.5±0.6 | 20.6±0.6 | 20.8±0.6 |
| <b>RhQ</b> | 5.0   | 19.7±0.5 | 19.8±0.5 | 20.0±0.5 | 20.1±0.5 | 20.3±0.5 | 20.4±0.4 | 20.6±0.4 | 20.8±0.5 |

\*  $p < 0.05$ , \*\*  $p < 0.01$ ,  $p$  vs vehicle control (5.0% v/v DMSO/ saline vehicle).

**Table S16.** In Vivo Anticancer Activity of **RhS** and **RhQ** toward A549CDDP tumor xenograft.

|            | mg/kg | average tumor weight (mean ± SD, g) | inhibition of tumor growth (%) |
|------------|-------|-------------------------------------|--------------------------------|
| Control    | -     | 1.517±0.053                         | -                              |
| <b>RhS</b> | 5.0   | 1.036±0.050**                       | 46.4                           |
| <b>RhQ</b> | 5.0   | 0.977±0.076**                       | 55.3                           |

\*  $p < 0.05$ , \*\*  $p < 0.01$ ,  $p$  vs vehicle control (5.0% v/v DMSO/ saline vehicle).



**Original images for Figure 9:**

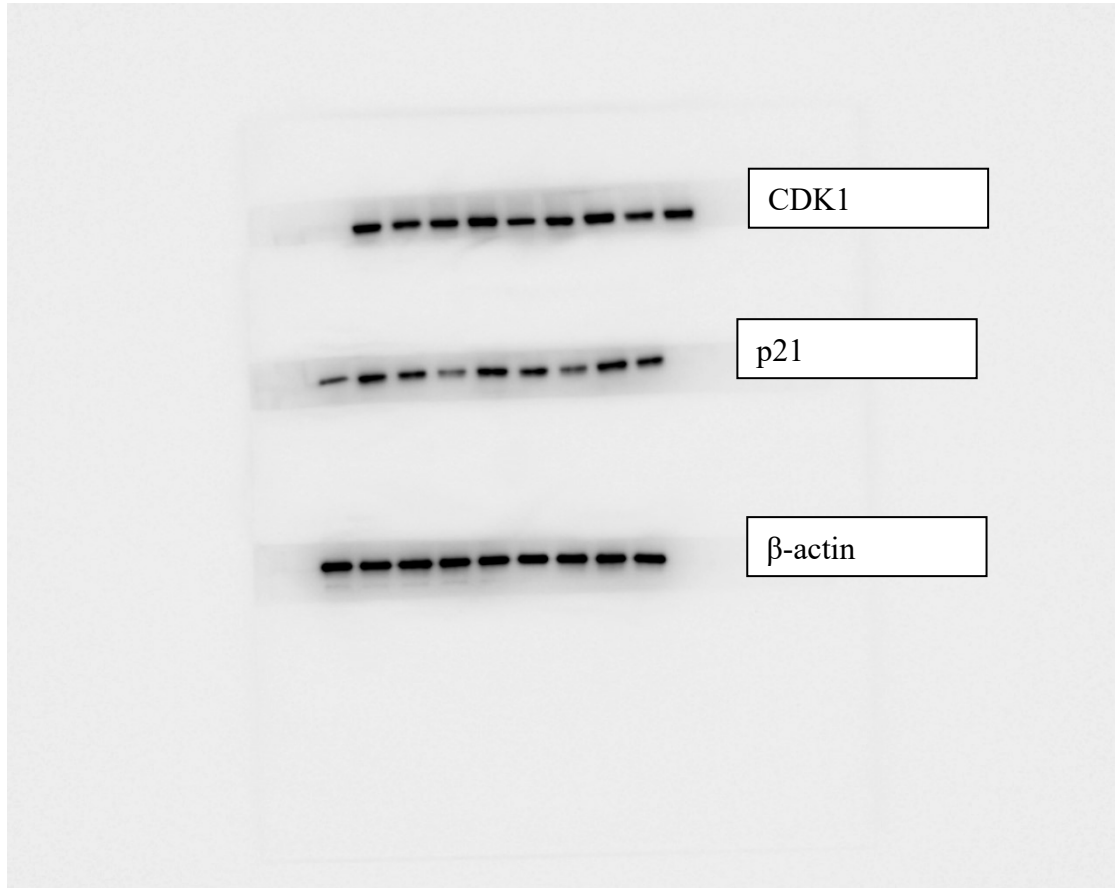

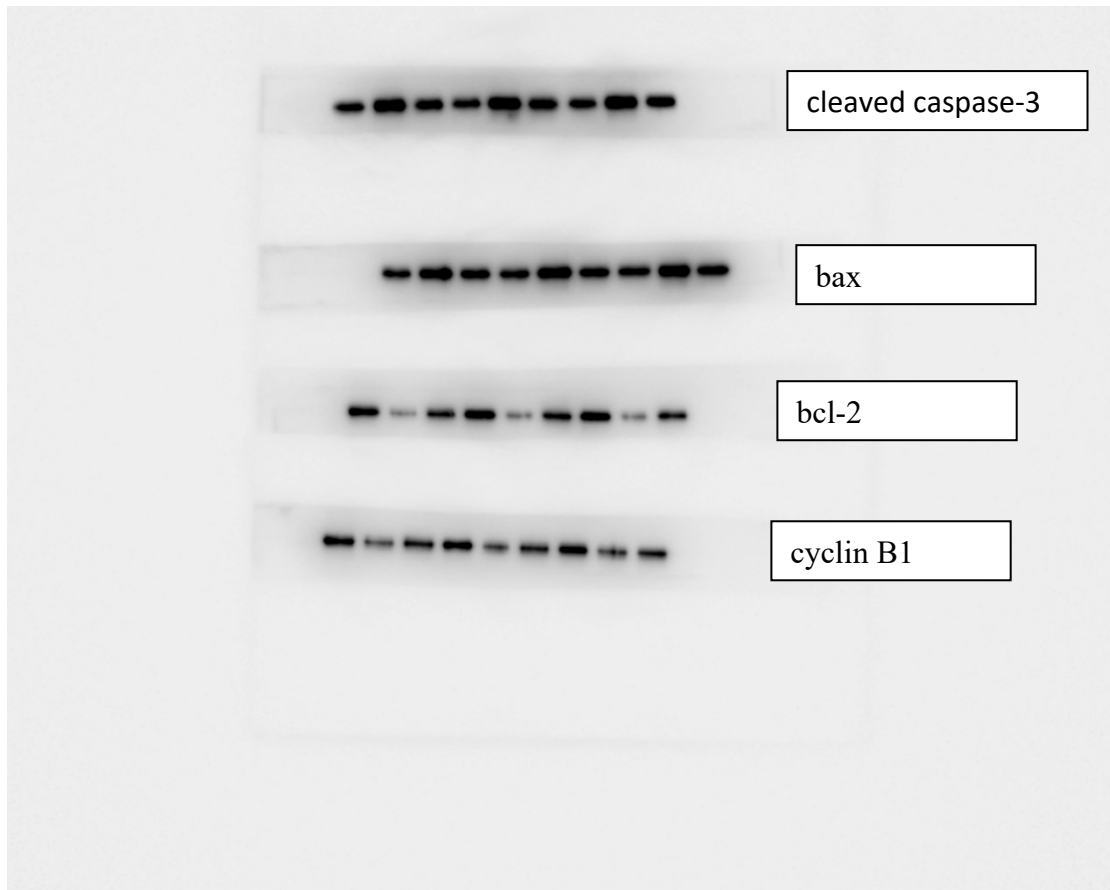

## Methods

### *The other experimental methods*

The antitumor mechanism of **RhN1**, **RhN2**, **RhS** and **RhQ** were performed as reported by Liu, Qin, Duan, Zhang and Galons<sup>1-6</sup>.

### *1.1 Materials*

The Tris, gel loading buffer, RNase A (100 µg/mL), 2-nitrobenzoic acid and propidium iodide (PI, 50 µg/mL) were purchased from Sigma. The antibody of cyclinB1, CDK1, p21, bax, cleaved caspase-3 and bcl-2 were purchased from Abcam.

The tumor cell lines A549, A549CDDP and HL-7702 cells were obtained from the

Shanghai Institute for Biological Science (China). The Annexin V APC and 7-AAD double staining were purchased from FACS Aria II flow cytometer (BD Biosciences, San Jose, CA, USA).

### ***1.2 Instruments***

Elemental analyses (C, H, N) were carried out on a PerkinElmer series II CHNS/O 2400 elemental analyzer. NMR spectra were recorded on a Bruker AV-500 NMR spectrometer. Bioimaging assays were analyzed by confocal microscopy (Olympus FV3000). ESI-MS spectra were performed on Thermofisher Scientific Exactive LC-MS spectrometer (Thermal Electronic, USA). The DNA damage were obtained on a fluorescent microscopy (Olympus BX43) at 25 °C. MTT assay were performed on M1000 microplate reader (Tecan Trading Co. Ltd., Shanghai, China). Cell cycle and apoptosis analysis results were recorded on FACS Aria II flow cytometer (BD Biosciences, San Jose, CA, USA).

### ***1.3 MTT assays***

The each cell culture was maintained in RPMI-1640 medium supplemented with 10.0% fetal bovine serum (FBS), 100.0 U/mL penicillin, and 100.0 µg/mL streptomycin in 25.0 cm<sup>2</sup> culture flasks at 37 °C in a humidified atmosphere with 5.0% CO<sub>2</sub>. All the cells to be tested in the following assays had a passage number of 3.0-6.0. The cells were seeded in 96 well plates at the density of 5000-8000 cells per well for 24 h, then incubated with different concentrations of **RhN1**, **RhN2**, **RhS** and **RhQ** for 24 h. Cell medium was discarded and MTT (1.0 mg/mL) was added. 4.0 h later, MTT solution was removed and DMSO was added. And obtained the results by a M1000

microplate reader (Tecan Trading Co. Ltd., Shanghai, China) at 570 nm.

#### ***1.4 Apoptosis and bioimaging assay***

Annexin V-FITC staining of the membranes was performed by using the Annexin V APC (which detects phosphatidylserine residues translocated from the inner to the outer cell membrane in early apoptotic stages) and 7-AAD (stains necrotic cells). The A549CDDP cells were incubated with **RhS** (0.7 $\mu$ M) and **RhQ** (0.08 $\mu$ M) for 24 h, and then stained with Annexin V APC (5  $\mu$ L) and 7-AAD (5  $\mu$ L) double staining, and analyzed by flow cytometry. Similar procedure was used for bioimaging assay (100 nM Mito-Red), and analyzed by confocal microscopy (Olympus FV3000).

#### ***1.5 Molecular docking experiments***

The molecular docking simulations were performed with the aid of Autodock 4.2.6 software package (G. M. Morris, R. Huey, W. Lindstrom, M. F. Sanner, R. K. Belew, D. S. Goodsell, A. J. Olson, *J. Comput. Chem.* **2009**, *30*, 2785-2791) <sup>5</sup>. The crystal structure of DNA, with the PDB ID: 1BNA, was obtained from Protein Data Bank. The **RhS** and **RhQ** in this study were docked into both the major and minor binding sites of the DNA structure using Auto Dock tools (ADT). The information of the binding sites used in this study was the same as *Angew. Chem. Int. Ed.* **2020**, *59*, 6420–6427 <sup>5</sup>. The nonpolar hydrogen atoms were merged and only the polar hydrogens remained. The Gasteiger charges were added to the DNA and **RhS** and **RhQ** molecules. A box size of 80 \* 80 \* 100 Å<sup>3</sup> with a grid spacing 0.375 Å was defined around the major or minor binding sites of the DNA. The grid map around the binding site of the DNA was generated by the probe atoms employing the Auto Grid

program. Each grid in the map represents the potential energy of a probe atom in the presence of all the atoms of the DNA molecule. The docking simulation was performed with the Lamarckian Genetic Algorithm (LGA) with 1500000 iterations and was repeated 270000 times to generate 100 docking conformations of the compounds on the DNA molecule. Results were clustered with a rootmean-square distance (RMSD) of 2.0 Å. Clusters with the lowest binding energies were considered the most favorable conformations.

### ***1.6 DNA damage assay***

DNA damage assay was investigated by means of comet assay<sup>2,3</sup>. The A549CDDP cells in culture medium were incubated with different concentration of **RhS** (0.7µM) and **RhQ** (0.08µM) for 24 h at 37 °C. The A549CDDP cells were harvested by a trypsinization process at 24 h. A total of 100 mL of 0.5% normal agarose in PBS was dropped gently onto a fully frosted microslide, covered immediately with a coverslip, and then placed at 4 °C for 15 min. The coverslip was removed after the gel had been set. A mixture of 50 mL of the cell suspension (200 cells/mL) mixed with 50 mL of 1.0% low melting agarose was preserved at 37 °C. A total of 100 mL of this mixture was applied quickly on top of the gel, coated over the microslide, covered immediately with a coverslip, and then placed at 4 °C for 15 min. The coverslip was again removed after the gel had been set. A third coating of 50 mL of 0.5% low melting agarose was placed on the gel and allowed to place at 4 °C for 20 min. After solidification of the agarose, the coverslips were removed, and the slides were immersed in an ice-cold lysis solution (2.5 M NaCl, 100mM EDTA, 10mM Tris,

90mM sodium sarcosinate, NaOH, pH 10.0, 1.0% Triton X-100 and 10.0% DMSO) and placed in a refrigerator at 4 °C for 2.5 h. All of the above operations were performed under low lighting conditions to avoid additional DNA damage. The slides, after removal from the lysis solution, were placed horizontally in an electrophoresis chamber. The reservoirs were filled with an electrophoresis buffer (300mM NaOH, 1.2mM EDTA) until the slides were just immersed in it, and the DNA was allowed to unwind for 35 min in electrophoresis solution. Then the electrophoresis was carried out at 25 V and 300.0mA for 25 min. After electrophoresis, the slides were removed, washed thrice in a neutralization buffer (400mM Tris, HCl, pH 7.5). The A549CDDP cells were stained with 25  $\mu$ L of EB (20.0 mg/mL) in the dark for 25min. The slides were washed in chilled distilled water for 15.0 min to neutralize the excess alkali, air-dried and scored for comets by fluorescent microscopy (Olympus BX43, magnification 200 $\times$ ).

### ***1.7 Western Blot***

The A549CDDP cells were incubated with **RhS** (0.7 $\mu$ M) and **RhQ** (0.08 $\mu$ M) for 24 h, and then the cells harvested from each well of the culture plates were lysed in 150.0  $\mu$ L of extraction buffer consisting of 149.0  $\mu$ L of RIPA lysis buffer and 1.0  $\mu$ L of PMSF (100.0 mM). The suspension was centrifuged at 10 000 rpm at 4 °C for 10 min, and the supernatant (10 $\mu$ L for each sample) was loaded onto 10% polyacrylamide gel and then transferred to a microporous polyvinylidene difluoride (PVDF)membrane. Western blotting was performed using anti-apoptotic antibody, or anti- $\beta$ -actin primary antibody and horseradish-peroxidase-conjugated anti-mouse or

anti-rabbit secondary antibody. The protein bands were visualized using chemiluminescence substrate.

### ***1.8 Anticancer activity toward A549CDDP in vivo***

The A549CDDP cells were harvested and injected subcutaneously into the right flank of nude mice with  $5 \times 10^6$  cells in 200  $\mu\text{L}$  of serum-free medium. When the xenograft tumor growth to the volume about 1000  $\text{mm}^3$ , the mice were killed and the tumor tissue were cut into about 1.5  $\text{mm}^3$  small pieces, and then transplanted into the right flank of female nude mice, When tumors reach a volume of 90-100  $\text{mm}^3$  on all mice, the mice were randomized into vehicle control and treatment groups (n=6/group), received the following treatments: (a) vehicle control, 5.0% v/v DMSO/saline vehicle, (b) **RhS** at dose 5.0 mg/kg every two day (10% v/v DMSO/saline), (c) **RhQ** (5.0 mg/kg) via percutaneous injection every 2 days (q2d). The tumor volumes were determined every three days by measuring length ( $l$ ) and width ( $w$ ) and calculating volume, tumor volume and inhibition of tumor growth were calculated using formulas 1–3:

$$\text{Tumor volume: } V = (w^2 \times l) / 2 \quad (1)$$

$$\text{The tumor relative increment rate: } T/C (\%) = T_{\text{RTV}} / C_{\text{RTV}} \times 100\% \quad (2)$$

$$\text{inhibition of tumor growth: } IR(\%) = (W_c - W_t) / W_c \times 100\% \quad (3)$$

Where  $w$  and  $l$  mean the shorter and the longer diameter of the tumor respectively;  $T_{\text{RTV}}$  and  $C_{\text{RTV}}$  was the RTV of treated group and control group respectively. (RTV: relative tumor volume,  $\text{RTV} = V_t / V_0$ );  $W_t$  and  $W_c$  mean the average tumor weight of complex-treated and vehicle controlled group respectively.

In addition, the A549CDDP xenograft mouse models were purchased from Changzhou Cavens Experimental Animal Co., Ltd (Jiangsu, China, Approval No. SCXK 2016-0010). The animal procedures were approved by Changzhou Cavens Experimental Animal Co., Ltd (Jiangsu, China, Approval No. SYXK (Su) 2017-0007). Further, all the experimental procedures were conducted in accordance with the NIH Guidelines for the Care and Use of Laboratory Animals. Animal experiments were approved by Changzhou Cavens Experimental Animal Co., Ltd ((Jiangsu, China).

### ***1.9 Statistical analysis***

The experiments of in vitro antiproliferative activity have been repeated from five times, and the results obtained are presented as means  $\pm$  standard deviation (SD). Significant changes were assessed by using Student's *t* test for unpaired data, and *p* values of  $<0.01$  were considered significant.



## References

- 1 (a) Q.-P. Qin, Z.-Z. Wei, Z.-F. Wang, X.-L. Huang, M.-X. Tan, H.-H. Zou, H. Liang, Imaging and therapeutic applications of Zn(II)-cryptolepine–curcumin molecular probes in cell apoptosis detection and photodynamic therapy, *Chem. Commun.*, 2020, **56**, 3999–4002. (b) Z.-F. Chen, Q.-P. Qin, J.-L. Qin, Y.-C. Liu, K.-B. Huang, Y.-L. Li, T. Meng, G.-H. Zhang, Y. Peng, X.-J. Luo, H. Liang, Stabilization of G-quadruplex DNA, inhibition of telomerase activity, and tumor cell apoptosis by organoplatinum(II) complexes with oxoisoaporphine, *J. Med. Chem.*, 2015, **58**, 2159–2179. (b) Z.-F. Wang, X.-F. Zhou, Q.-C. Wei, Q.-P. Qin, J.-X. Li, M.-X. Tan, S.-H. Zhang, Novel bifluorescent Zn(II)–cryptolepine–cyclen complexes trigger apoptosis induced by nuclear and mitochondrial DNA damage in cisplatin-resistant lung tumor cells, *Eur. J. Med. Chem.*, 2022, **238**, 114418. (c) Z.-F. Wang, Q.-X. Nong, H.-L. Yu, Q.-P. Qin, F.-H. Pan, M.-X. Tan, H. Liang, S.-H. Zhang, Complexes of Zn(II) with a mixed tryptanthrin derivative and curcumin chelating ligands as new promising anticancer agents, *Dalton Trans.*, 2022, **51**, 5024–5033.
- 2 B. Tang, D. Wan, Y.-J. Wang, Q.-Y. Yi, B.-H. Guo, Y.-J. Liu, An iridium(III) complex as potent anticancer agent induces apoptosis and autophagy in B16 cells through inhibition of the AKT/Mtor pathway, *Eur. J. Med. Chem.*, 2018, **145**, 302–314.
- 3 C.-C. Zeng, S.-H. Lai, J.-H. Yao, C. Zhang, H. Yin, W. Li, B.-J. Han, Y.-J. Liu, The induction of apoptosis in HepG-2 cells by ruthenium(II) complexes through an

- intrinsic ROS-mediated mitochondrial dysfunction pathway, *Eur. J. Med. Chem.*, 2016, **122**, 118–126.
- 4 M. Li, C. Du, N. Guo, Y. Teng, X. Meng, H. Sun, S. Li, P. Yu, H. Galons, Composition design and medical application of liposomes, *Eur. J. Med. Chem.*, 2019, **164**, 640–653.
- 5 (a) X. Li, J. Wu, L. Wang, C. He, L. Chen, Y. Jiao, C. Duan, Mitochondrial-DNA-targeted Ir<sup>III</sup>-containing metallohelicenes with tunable photodynamic therapy efficacy in cancer cells, *Angew. Chem. Int. Ed.*, 2020, **59**, 6420–6427. (b) G. M. Morris, R. Huey, W. Lindstrom, M. F. Sanner, R. K. Belew, D. S. Goodsell, A. J. Olson, AutoDock4 and autoDockTools4: automated docking with selective receptor flexibility, *J. Comput. Chem.*, 2009, **30**, 2785–2791.
- 6 (a) M. Li, C. Du, N. Guo, Y. Teng, X. Meng, H. Sun, S. Li, P. Yu, H. Galons, Composition design and medical application of liposomes, *Eur. J. Med. Chem.*, 2019, **164**, 640–653. (b) Y. Ai, B. Zhu, C. Ren, F. Kang, J. Li, Z. Huang, Y. Lai, S. Peng, K. Ding, J. Tian, Y. Zhang, Discovery of new monocarbonyl ligustrazine-curcumin hybrids for intervention of drug-sensitive and drug-resistant lung cancer, *J. Med. Chem.*, 2016, **59**, 1747–1760.
